# Supplementary material for: Comparative Transcriptome Analysis Identifies Crucial Candidate Genes and Pathways in The Hypothalamic-Pituitary-Gonadal Axis During External Genitalia Development of Male Geese
Source: Research Square preprint supplement (doi:10.21203/rs.3.rs-892387/v1), 2021-10-05
Supplement: Supplementary file 1 [file 1838f26bd394509920741be6.xlsx]

## Sheet: Table S3
Table S3: Top 30 GO terms enriched by the DEGs in different tissues and related information
Tissue	#Term	Database	ID	Input number	Background number	P-Value	Corrected P-Value	Input	Hyperlink
hypothalamus	collagen trimer	Gene Ontology	GO:0005581	3	34	4.34525e-05	0.00915046	C1QTNF3|MARCO|COL9A1	http://amigo.geneontology.org/amigo/term/GO:0005581
	collagen type IX trimer	Gene Ontology	GO:0005594	2	5	6.93217e-05	0.00915046	MARCO|COL9A1	http://amigo.geneontology.org/amigo/term/GO:0005594
	basement membrane	Gene Ontology	GO:0005604	3	60	0.000214775	0.0189002	FREM1|MARCO|COL9A1	http://amigo.geneontology.org/amigo/term/GO:0005604
	visual perception	Gene Ontology	GO:0007601	3	85	0.000574751	0.0303469	PDE6H|CRYGS|IMPG1	http://amigo.geneontology.org/amigo/term/GO:0007601
	developmental process	Gene Ontology	GO:0032502	2	21	0.000819646	0.0317726	TCF24|TCF15	http://amigo.geneontology.org/amigo/term/GO:0032502
	extracellular region	Gene Ontology	GO:0005576	4	226	0.000842456	0.0317726	C1QTNF3|FGF18|NPPC|COL9A1	http://amigo.geneontology.org/amigo/term/GO:0005576
	photoreceptor inner segment	Gene Ontology	GO:0001917	2	25	0.00113182	0.0329783	GNAT2|IMPG1	http://amigo.geneontology.org/amigo/term/GO:0001917
	positive regulation of blood vessel endothelial cell migration	Gene Ontology	GO:0043536	2	25	0.00113182	0.0329783	FGF18|HSPB1	http://amigo.geneontology.org/amigo/term/GO:0043536
	extracellular matrix organization	Gene Ontology	GO:0030198	3	112	0.00124918	0.0329783	ELF3|MARCO|COL9A1	http://amigo.geneontology.org/amigo/term/GO:0030198
	G protein-coupled receptor binding	Gene Ontology	GO:0001664	2	38	0.00247721	0.0594531	MARCO|GNAT2	http://amigo.geneontology.org/amigo/term/GO:0001664
	photoreceptor outer segment	Gene Ontology	GO:0001750	2	41	0.00285782	0.062872	GNAT2|IMPG1	http://amigo.geneontology.org/amigo/term/GO:0001750
	extracellular matrix	Gene Ontology	GO:0031012	3	157	0.00319969	0.0649784	MARCO|OC90|COL9A1	http://amigo.geneontology.org/amigo/term/GO:0031012
	extracellular matrix structural constituent	Gene Ontology	GO:0005201	2	46	0.00354911	0.0656393	MARCO|COL9A1	http://amigo.geneontology.org/amigo/term/GO:0005201
	signal transduction	Gene Ontology	GO:0007165	4	342	0.00372951	0.0656393	LMBR1L|NPPC|IAPP|ANPEP	http://amigo.geneontology.org/amigo/term/GO:0007165
	external side of plasma membrane	Gene Ontology	GO:0009897	3	174	0.00424647	0.0694327	IL12RB1|ITGA2B|ANPEP	http://amigo.geneontology.org/amigo/term/GO:0009897
	cell-matrix adhesion	Gene Ontology	GO:0007160	2	52	0.00447105	0.0694327	ITGA2B|FREM1	http://amigo.geneontology.org/amigo/term/GO:0007160
	extracellular exosome	Gene Ontology	GO:0070062	2	55	0.00496915	0.0705824	ITGA2B|ANPEP	http://amigo.geneontology.org/amigo/term/GO:0070062
	hormone activity	Gene Ontology	GO:0005179	2	58	0.00549166	0.0705824	NPPC|IAPP	http://amigo.geneontology.org/amigo/term/GO:0005179
	positive regulation of protein phosphorylation	Gene Ontology	GO:0001934	2	58	0.00549166	0.0705824	FGF18|ADTRP	http://amigo.geneontology.org/amigo/term/GO:0001934
	positive regulation of angiogenesis	Gene Ontology	GO:0045766	2	70	0.00782023	0.0705824	FGF18|HSPB1	http://amigo.geneontology.org/amigo/term/GO:0045766
	detection of chemical stimulus involved in sensory perception of bitter taste	Gene Ontology	GO:0001580	1	5	0.0110098	0.0705824	GNAT2	http://amigo.geneontology.org/amigo/term/GO:0001580
	leukemia inhibitory factor receptor activity	Gene Ontology	GO:0004923	1	5	0.0110098	0.0705824	IL12RB1	http://amigo.geneontology.org/amigo/term/GO:0004923
	muscle organ morphogenesis	Gene Ontology	GO:0048644	1	5	0.0110098	0.0705824	TCF15	http://amigo.geneontology.org/amigo/term/GO:0048644
	oncostatin-M receptor activity	Gene Ontology	GO:0004924	1	5	0.0110098	0.0705824	IL12RB1	http://amigo.geneontology.org/amigo/term/GO:0004924
	craniofacial suture morphogenesis	Gene Ontology	GO:0097094	1	5	0.0110098	0.0705824	FREM1	http://amigo.geneontology.org/amigo/term/GO:0097094
	leukemia inhibitory factor signaling pathway	Gene Ontology	GO:0048861	1	5	0.0110098	0.0705824	IL12RB1	http://amigo.geneontology.org/amigo/term/GO:0048861
	positive regulation of vascular endothelial growth factor receptor signaling pathway	Gene Ontology	GO:0030949	1	5	0.0110098	0.0705824	FGF18	http://amigo.geneontology.org/amigo/term/GO:0030949
	oncostatin-M-mediated signaling pathway	Gene Ontology	GO:0038165	1	5	0.0110098	0.0705824	IL12RB1	http://amigo.geneontology.org/amigo/term/GO:0038165
	response to interferon-beta	Gene Ontology	GO:0035456	1	5	0.0110098	0.0705824	IKBKE	http://amigo.geneontology.org/amigo/term/GO:0035456
	intramembranous ossification	Gene Ontology	GO:0001957	1	5	0.0110098	0.0705824	FGF18	http://amigo.geneontology.org/amigo/term/GO:0001957
pituitary gland	integral component of plasma membrane	Gene Ontology	GO:0005887	19	646	1.07154e-07	5.53456e-05	EDA2R|EPHB6|SLC6A4|SLC16A1|SLC6A9|EPHA10|ADGRD2|GPR149|ADAM8|SSTR1|ADGRG6|SSTR2|CHRNA2|SLCO2B1|GABRE|TSHR|TMC5|RXFP3|GRM3	http://amigo.geneontology.org/amigo/term/GO:0005887
	neuron projection	Gene Ontology	GO:0043005	11	193	1.3209e-07	5.53456e-05	EPHB6|SLC6A4|TMIGD1|CAMK2A|GPR149|SSTR1|SSTR2|CHRNA2|EPHA10|GABRE|ADCYAP1R1	http://amigo.geneontology.org/amigo/term/GO:0043005
	signal transduction	Gene Ontology	GO:0007165	13	342	8.145e-07	0.000227517	FAM19A2|RASL12|HPCAL4|DIRAS2|WISP2|PDE1A|RASL11A|SPP1|CHRNA2|GABRE|CALCB|FAM83G|PDE10A	http://amigo.geneontology.org/amigo/term/GO:0007165
	extracellular matrix	Gene Ontology	GO:0031012	9	157	1.80707e-06	0.000337498	COL10A1|COL8A2|ADAMTSL1|PAPLN|CHAD|WISP2|ASPN|VCAN|ADAMTS8	http://amigo.geneontology.org/amigo/term/GO:0031012
	collagen-containing extracellular matrix	Gene Ontology	GO:0062023	7	82	2.24341e-06	0.000337498	SOD3|THBS4|ADAMTS8|THBS1|GPC3|FMOD|MYOC	http://amigo.geneontology.org/amigo/term/GO:0062023
	extracellular space	Gene Ontology	GO:0005615	18	731	2.81919e-06	0.000337498	PGF|COL8A2|FAM19A2|SOD3|CHAD|LAMA1|ASPN|FSHB|ENPP2|CA6|CX3CL1|COL10A1|VEGFA|FMOD|MYOC|SPP1|CALCB|FGF3	http://amigo.geneontology.org/amigo/term/GO:0005615
	calcium ion binding	Gene Ontology	GO:0005509	13	447	1.36521e-05	0.00127116	CALN1|HEG1|HPCAL4|CDH20|ENPP2|ASPN|VCAN|TLL2|ADAM8|CALML4|HPCA|THBS1|THBS4	http://amigo.geneontology.org/amigo/term/GO:0005509
	heparin binding	Gene Ontology	GO:0008201	6	75	1.72179e-05	0.00144286	WISP2|MUC1|THBS1|NAV2|SPP1|VEGFA	http://amigo.geneontology.org/amigo/term/GO:0008201
	metalloendopeptidase activity	Gene Ontology	GO:0004222	6	84	3.14413e-05	0.00239526	TLL2|ADAMTSL1|PAPLN|ADAMTS8|ADAM8|MME	http://amigo.geneontology.org/amigo/term/GO:0004222
	embryonic hindlimb morphogenesis	Gene Ontology	GO:0035116	4	28	5.92672e-05	0.00413883	TWIST1|TBX3|GPC3|ZBTB16	http://amigo.geneontology.org/amigo/term/GO:0035116
	positive regulation of bone resorption	Gene Ontology	GO:0045780	3	10	7.93087e-05	0.00511236	SPP1|ADAM8|FSHB	http://amigo.geneontology.org/amigo/term/GO:0045780
	extracellular matrix organization	Gene Ontology	GO:0030198	6	112	0.000142758	0.0079754	COL10A1|COL8A2|ADAMTSL1|PAPLN|ADAMTS8|GFAP	http://amigo.geneontology.org/amigo/term/GO:0030198
	neuropeptide binding	Gene Ontology	GO:0042923	3	18	0.000354631	0.0185738	SSTR1|SSTR2|GPR149	http://amigo.geneontology.org/amigo/term/GO:0042923
	plasma membrane	Gene Ontology	GO:0005886	23	1580	0.000414873	0.0204508	RASL12|CAMK1G|SLC6A4|SLC6A9|SLC7A2|PLP1|ADCYAP1R1|DIRAS2|TMIGD1|AMER3|ENTPD3|HSPB1|GAB2|GSG1|ZDHHC22|OSBP2|EDA2R|KCNJ5|ARC|MME|GPD1L|FLNB|CMTM6	http://amigo.geneontology.org/amigo/term/GO:0005886
	integral component of membrane	Gene Ontology	GO:0016021	32	2565	0.000443066	0.0206272	SLC7A2|CCR7|GAL3ST1|PLP1|ADCYAP1R1|TMEM114|WISP2|ST6GALNAC3|TMIGD1|NDST4|CX3CL1|OSBP2|GSG1|ENTPD3|HEG1|CDH20|MUC1|LCT|SLN|CHRNA2|ZDHHC22|HHATL|ST6GALNAC2|FADS6|CALN1|SLC16A1|SDC1|LRRC32|GJC1|SLC25A48|MME|CMTM6	http://amigo.geneontology.org/amigo/term/GO:0016021
	regulation of insulin secretion	Gene Ontology	GO:0050796	3	23	0.000676511	0.0298377	SLC16A1|ALOX5|TFAP2B	http://amigo.geneontology.org/amigo/term/GO:0050796
	sprouting angiogenesis	Gene Ontology	GO:0002040	3	25	0.000844114	0.0330957	PGF|VEGFA|THBS1	http://amigo.geneontology.org/amigo/term/GO:0002040
	positive regulation of mast cell chemotaxis	Gene Ontology	GO:0060754	2	5	0.000908354	0.0330957	PGF|VEGFA	http://amigo.geneontology.org/amigo/term/GO:0060754
	somatostatin signaling pathway	Gene Ontology	GO:0038170	2	5	0.000908354	0.0330957	SSTR1|SSTR2	http://amigo.geneontology.org/amigo/term/GO:0038170
	somatostatin receptor activity	Gene Ontology	GO:0004994	2	5	0.000908354	0.0330957	SSTR1|SSTR2	http://amigo.geneontology.org/amigo/term/GO:0004994
	extracellular region	Gene Ontology	GO:0005576	7	226	0.000989437	0.0345478	COL10A1|SOD3|CCDC80|GPC3|CALCB|FGF3|CXCL14	http://amigo.geneontology.org/amigo/term/GO:0005576
	cell adhesion	Gene Ontology	GO:0007155	6	166	0.00106276	0.0356236	LAMA1|WISP2|THBS4|VCAN|THBS1|SPP1	http://amigo.geneontology.org/amigo/term/GO:0007155
	ion transmembrane transport	Gene Ontology	GO:0034220	4	64	0.0011142	0.0359114	GABRE|TMC5|CHRNA2|GJC1	http://amigo.geneontology.org/amigo/term/GO:0034220
	alpha-N-acetylgalactosaminide alpha-2,6-sialyltransferase activity	Gene Ontology	GO:0001665	2	6	0.00120583	0.0360889	ST6GALNAC3|ST6GALNAC2	http://amigo.geneontology.org/amigo/term/GO:0001665
	-	Gene Ontology	GO:0042535	2	6	0.00120583	0.0360889	THBS1|HSPB1	http://amigo.geneontology.org/amigo/term/GO:0042535
	positive regulation of angiogenesis	Gene Ontology	GO:0045766	4	70	0.00152632	0.0441054	PGF|THBS1|VEGFA|HSPB1	http://amigo.geneontology.org/amigo/term/GO:0045766
	adenylate cyclase-activating G protein-coupled receptor signaling pathway	Gene Ontology	GO:0007189	4	74	0.00185363	0.0459947	TSHR|CALCB|ADGRD2|ADGRG6	http://amigo.geneontology.org/amigo/term/GO:0007189
	amino acid binding	Gene Ontology	GO:0016597	2	8	0.00192102	0.0459947	ASS1|DDAH1	http://amigo.geneontology.org/amigo/term/GO:0016597
	astrocyte development	Gene Ontology	GO:0014002	2	8	0.00192102	0.0459947	PLP1|GFAP	http://amigo.geneontology.org/amigo/term/GO:0014002
	amino acid transport	Gene Ontology	GO:0006865	2	8	0.00192102	0.0459947	SLC25A48|SLC7A2	http://amigo.geneontology.org/amigo/term/GO:0006865
testis	microtubule-based movement	Gene Ontology	GO:0007018	15	57	1.09793e-10	1.83355e-07	DNAI2|DNAH10|KIF9|KIF6|KIF24|DNAH8|KIF18A|KIF4A|KIF18B|KIF15|KIF11|DYNLRB2|WDR63|KIF2C|KIF2B	http://amigo.geneontology.org/amigo/term/GO:0007018
	microtubule binding	Gene Ontology	GO:0008017	22	162	4.96156e-10	4.1429e-07	PLK1|CEP57L1|KIF15|KIF11|PRC1|MAP9|KIF2C|KIF2B|TPX2|NUSAP1|RACGAP1|KIF4A|KIF9|KIF6|KIF18A|KATNAL2|KIF18B|KIF24|NME8|SGIP1|GAS8|SPATA4	http://amigo.geneontology.org/amigo/term/GO:0008017
	flagellated sperm motility	Gene Ontology	GO:0030317	11	37	1.18012e-08	4.11476e-06	APOB|GAS8|TEKT3|TEKT2|NME8|ROPN1L|CCDC40|PIH1D3|TCTE1|SLC26A8|DRC7	http://amigo.geneontology.org/amigo/term/GO:0030317
	mitotic cytokinesis	Gene Ontology	GO:0000281	11	37	1.18012e-08	4.11476e-06	INCENP|NUSAP1|PLK1|ANLN|TRIM36|KIF4A|RACGAP1|CKAP2|PRC1|MAP9|EFHC1	http://amigo.geneontology.org/amigo/term/GO:0000281
	neuropeptide signaling pathway	Gene Ontology	GO:0007218	14	81	5.03382e-08	1.40108e-05	NPY|NPSR1|GPR143|NTS|NTSR1|GALR1|NPFFR1|GALR3|GPR83|SSTR3|SSTR5|GRPR|ECEL1|HCRTR2	http://amigo.geneontology.org/amigo/term/GO:0007218
	microtubule motor activity	Gene Ontology	GO:0003777	10	40	2.1821e-07	5.20587e-05	DNAH10|KIF9|KIF6|KIF24|KIF18A|KIF4A|KIF18B|KIF15|KIF2C|KIF2B	http://amigo.geneontology.org/amigo/term/GO:0003777
	cilium assembly	Gene Ontology	GO:0060271	16	127	2.9063e-07	6.0669e-05	BBS9|NME5|IQUB|RFX4|KIF24|TEKT3|TEKT2|TEKT5|CCDC113|HYLS1|CEP126|NME8|TTC36|CEP41|TEKT1|RAB17	http://amigo.geneontology.org/amigo/term/GO:0060271
	integral component of plasma membrane	Gene Ontology	GO:0005887	37	646	2.84938e-06	0.000528717	MUSK|HTR5A|RGR|EPHA8|PRPH2|GPR19|KCNK1|GCGR|SLC24A1|GPRC6A|CHRNB3|SSTR3|SLCO4C1|SLCO4A1|GRM2|STRA6|NLGN4X|NPFFR1|CHRNA6|SLC26A6|SLC26A8|GRPR|NPSR1|FGFR3|PCDH8|RHCG|SLC26A9|NTSR1|GALR3|GJA8|GALR1|SSTR5|HTR1B|TLR5|HCRTR2|LPAR6|ABCC2	http://amigo.geneontology.org/amigo/term/GO:0005887
	mitotic sister chromatid segregation	Gene Ontology	GO:0000070	7	24	6.32505e-06	0.000946181	INCENP|NEK2|PLK1|KIF18A|KIF18B|MIS12|CDCA8	http://amigo.geneontology.org/amigo/term/GO:0000070
	microtubule	Gene Ontology	GO:0005874	14	129	7.77264e-06	0.000946181	ODF2|TPX2|KIF9|KIF6|KIF18A|KATNAL2|KIF18B|KIF15|KIF4A|DYNLRB2|INCENP|GAS8|KIF2C|KIF2B	http://amigo.geneontology.org/amigo/term/GO:0005874
	troponin complex	Gene Ontology	GO:0005861	5	8	7.92125e-06	0.000946181	TNNT3|TNNT2|TNNC1|TNNC2|TNNI1	http://amigo.geneontology.org/amigo/term/GO:0005861
	cilium movement involved in cell motility	Gene Ontology	GO:0060294	5	8	7.92125e-06	0.000946181	TEKT1|WDR63|TEKT3|TEKT2|TEKT5	http://amigo.geneontology.org/amigo/term/GO:0060294
	sperm flagellum	Gene Ontology	GO:0036126	7	25	7.93206e-06	0.000946181	ODF2|NME5|TEKT3|RSPH1|TEKT5|TCTE1|GAS8	http://amigo.geneontology.org/amigo/term/GO:0036126
	cytoplasm	Gene Ontology	GO:0005737	89	2299	9.71079e-06	0.00105746	IFT27|FHIT|SULT1B1|RLBP1|CLMN|HPCA|PPIL6|CFAP69|DCK|NR0B2|ROPN1L|PLK1|CAMK2A|LRRC2|GC|CENPU|SERPINB5|RBM44|SLC2A2|ARHGAP19|ODF2|ALB|AANAT|NEK2|TEKT3|DRC7|ANXA10|KCNIP1|TOP2A|INCENP|SPATA18|KATNAL2|FGF5|AFP|TBPL2|TBPL1|ARG2|SGIP1|MELK|PRDM1|MEIOB|RCAN1|CCDC40|MAPK10|TBX4|TBX5|NDC80|CSDC2|BTG4|NUSAP1|ASPM|STMN2|DUSP8|S100A1|KLHL10|CLIC5|FGF3|TSSK3|SIAH3|CEP41|SRL|LEF1|SYNE3|AK9|NEUROD1|FAM65B|AK7|C…	http://amigo.geneontology.org/amigo/term/GO:0005737
	calcium ion binding	Gene Ontology	GO:0005509	28	447	1.01314e-05	0.00105746	HABP2|ACAN|NCS1|MYL4|HPCA|TNNC1|PLA2G1B|PKDREJ|SYT10|TNNC2|RASEF|ANXA10|S100A1|KCNIP1|CDH6|MATN4|PPEF2|CALB1|PPEF1|EFCAB1|SNTN|PCDH8|GUCA1A|CLGN|CALML4|MELK|CDH7|CALR3	http://amigo.geneontology.org/amigo/term/GO:0005509
	acrosomal vesicle	Gene Ontology	GO:0001669	7	27	1.21696e-05	0.00119548	CAPZA3|IQUB|CALCR|TRIM36|ENKUR|ZPBP|ZPBP2	http://amigo.geneontology.org/amigo/term/GO:0001669
	microtubule depolymerization	Gene Ontology	GO:0007019	5	10	1.77723e-05	0.00164887	KIF24|STMN2|KIF18A|KIF2C|KIF18B	http://amigo.geneontology.org/amigo/term/GO:0007019
	extracellular region	Gene Ontology	GO:0005576	18	226	2.21139e-05	0.0019437	WNT2B|NME5|ENTPD5|TECTB|FGF3|VSTM2A|NTS|UTS2B|OTOG|GAS8|ESM1|PLA2G1B|FGF5|CCDC40|ZPBP|NPPC|NRTN|ZPBP2	http://amigo.geneontology.org/amigo/term/GO:0005576
	multicellular organism development	Gene Ontology	GO:0007275	15	172	4.05131e-05	0.00338285	MUSK|ODF2|SFRP5|HOXD4|PLCZ1|EPHA8|GATM|SIAH3|PAX6|EBF3|SLC26A8|FGF3|FGFR3|CDH7|CDH6	http://amigo.geneontology.org/amigo/term/GO:0007275
	cell division	Gene Ontology	GO:0051301	10	83	6.92487e-05	0.00513206	CCNB3|CCNB2|CKS2|SPAG5|KIF18B|CDK1|MIS12|CDCA8|NDC80|TOP2A	http://amigo.geneontology.org/amigo/term/GO:0051301
	axoneme	Gene Ontology	GO:0005930	8	51	7.05699e-05	0.00513206	CCDC65|CCDC40|DNAJB13|GAS8|AKAP14|EFHC1|DRC1|SPATA4	http://amigo.geneontology.org/amigo/term/GO:0005930
	chromosome segregation	Gene Ontology	GO:0007059	7	37	7.06811e-05	0.00513206	INCENP|NEK2|CENPN|MIS12|NDC80|SPC25|TOP2A	http://amigo.geneontology.org/amigo/term/GO:0007059
	RNA polymerase II cis-regulatory region sequence-specific DNA binding	Gene Ontology	GO:0000978	24	409	0.000111841	0.00778225	HESX1|MYBL1|TBX5|NKX2-2|ELF3|SOX6|GCM1|MYT1|FOXJ1|TCFL5|NR4A2|POU4F2|PAX6|EBF3|LEF1|THAP1|ETV4|RFX4|RFX6|TLX1|FOXA1|FOXA2|PRDM1|FOXL2	http://amigo.geneontology.org/amigo/term/GO:0000978
	centrosome	Gene Ontology	GO:0005813	21	333	0.000116759	0.00779952	PPP1R42|CCNB2|IFT27|NEK2|CCNB3|DYNLRB2|CDK1|PLK1|EFHC1|CEP41|CEP57L1|CEP126|CKAP2|MCM3|HYLS1|CDC45|ODF2|CEP19|NDC80|HNMT|KIF2C	http://amigo.geneontology.org/amigo/term/GO:0005813
	mitotic spindle organization	Gene Ontology	GO:0007052	6	28	0.000129079	0.00829084	KIF4A|CEP126|AURKA|EFHC1|NDC80|SPC25	http://amigo.geneontology.org/amigo/term/GO:0007052
	spindle pole	Gene Ontology	GO:0000922	8	57	0.000141932	0.00877873	ODF2|TPX2|NEK2|PLK1|KATNAL2|KIF11|EFHC1|CEP19	http://amigo.geneontology.org/amigo/term/GO:0000922
	DNA-binding transcription activator activity, RNA polymerase II-specific	Gene Ontology	GO:0001228	20	319	0.000181148	0.0105026	FOXJ1|TBPL1|NEUROD1|ETV4|GCM1|RFX4|SOX11|RFX6|TLX1|CSRNP2|NR4A2|POU4F2|PAX6|EBF3|TBX4|TBX5|HOXD4|FOXL2|LEF1|ELF3	http://amigo.geneontology.org/amigo/term/GO:0001228
	inner dynein arm assembly	Gene Ontology	GO:0036159	4	9	0.000185364	0.0105026	CCDC40|WDR63|TEKT2|PIH1D3	http://amigo.geneontology.org/amigo/term/GO:0036159
	motile cilium	Gene Ontology	GO:0031514	6	31	0.000210141	0.0113205	RSPH1|IQUB|TEKT1|TEKT2|ROPN1L|DRC7	http://amigo.geneontology.org/amigo/term/GO:0031514
	kinesin complex	Gene Ontology	GO:0005871	6	32	0.000244609	0.0127655	KIF9|KIF6|KIF18A|KIF18B|KIF15|KIF2C	http://amigo.geneontology.org/amigo/term/GO:0005871
external genitalia	integral component of membrane	Gene Ontology	GO:0016021	155	2565	4.74117e-19	1.04543e-15	STYK1|SIDT1|PTGFR|CD36|HEPACAM2|ROS1|SLC39A11|LINGO3|ASB5|VSIG10|FNDC5|POPDC2|ATP6AP1|SLC34A2|SLC12A2|TMEM56|MFAP3L|SV2C|SLC12A8|CDH6|SLITRK4|AQP5|B3GALT2|CXADR|CDH20|CPD|MUC1|FSHR|ENPP3|SLC45A3|ENTPD8|CORIN|SLC25A21|VIPR1|CSF3R|TMEM71|SYT8|SLC2A9|APP|ROBO2|MEGF11|ATP8B1|TLR7|EMB|PAM|ANO1|RHBDL3|MGST2|SLC6A14|ST14|PLP1|PTGFRN|ATP7B|MARCO|WISP2|PDPN|EGF|DMBT1|DIO2|TRPM5|TMPRSS2|IGSF9B|KCNQ3|TMPRSS…	http://amigo.geneontology.org/amigo/term/GO:0016021
	extracellular space	Gene Ontology	GO:0005615	67	731	5.49722e-16	6.06069e-13	GREM2|PCSK9|ACE|AGR2|CHGB|QSOX1|CPD|SPARCL1|IL21|WFDC1|TIMP4|OLFM4|MYOC|SMOC2|CRH|LOXL1|MARCO|LINGO3|GLDN|CPXM1|FGF19|R3HDML|FRZB|SPARC|CPQ|COL28A1|CPAMD8|COL3A1|EDN3|NRG4|PI15|OSTN|CRISPLD1|GREM1|COLEC10|EFEMP1|FBN1|TF|MSTN|SERPINF1|VEGFC|SERPINF2|ADAMTS20|FGF3|SERPIND1|IGF1|SFRP2|AGRN|F2|SMPDL3A|BMP3|OMD|SFRP5|APP|KNG1|C1QTNF6|IL15|ITM2B|ANGPTL5|ANGPTL4|COL1A2|WNT9A|MMP9|WNT5A|KERA|WNT11|WNT7B	http://amigo.geneontology.org/amigo/term/GO:0005615
	plasma membrane	Gene Ontology	GO:0005886	95	1580	1.46829e-11	1.0792e-08	SYTL5|AVPR1B|PCSK9|LVRN|SIDT1|PTGFR|EGF|SLC39A11|FNDC5|ADAM28|SLC34A2|NEXN|MFAP3L|PPP1R16B|PRMT8|AQP5|KCNJ2|VIPR1|ENTPD8|CORIN|APCDD1L|SYT8|SYK|APP|ATP8B1|BST1|TLR7|CFTR|VDR|EMB|STXBP6|NMRK2|CNTN2|SLC6A14|LHCGR|GLDN|DRP2|ROS1|DMBT1|STX19|PLEK|ABCG4|MAPK8IP1|SDC3|SGIP1|ATP6V0A4|ITM2B|AGTR2|BEST4|CLDN10|ACE|SLC32A1|OLFM4|PLP1|HTRA1|NCAM2|FZD8|ALCAM|BAIAP2L1|CNKSR2|CADM1|RIMBP2|OSGIN1|ANO1|UNC13B|OC…	http://amigo.geneontology.org/amigo/term/GO:0005886
	apical plasma membrane	Gene Ontology	GO:0016324	22	144	1.23742e-09	6.82126e-07	ANO1|SHROOM3|HIP1R|ATP8B1|PDPN|SLC34A2|SCNN1A|SLC12A2|ATP6V0D2|AQP5|ATP1B1|SLC39A8|SLC26A4|PROM1|SLC26A9|SLC2A9|ADCY8|ATP6V0A4|ADRB2|ATP1A1|STK39|CFTR	http://amigo.geneontology.org/amigo/term/GO:0016324
	cell surface	Gene Ontology	GO:0009986	27	264	4.52372e-08	1.99496e-05	PCSK9|CDH17|SDC3|CNTN2|WIF1|CLSTN1|ITGBL1|GLDN|CAPN5|ROS1|SPARC|FSHR|TF|GREM1|KCNQ3|CORIN|DCSTAMP|GPC5|PROM1|SERPINF2|SLC26A9|RSPO2|APP|ROBO2|WNT5A|TMEM8B|CFTR	http://amigo.geneontology.org/amigo/term/GO:0009986
	calcium ion binding	Gene Ontology	GO:0005509	36	447	8.19814e-08	3.01282e-05	CDH17|PPP2R3B|SPARCL1|AGRN|CDH20|SMOC2|EGF|MCTP2|TPD52|FSTL1|CIB2|CDH19|SPARC|RASEF|ANXA10|CLSTN1|CDH6|PLCB1|MATN2|LTBP1|EFEMP1|PPEF2|FBN2|ENPP3|PPEF1|UNC13B|FBN1|HPGDS|GALNT3|SYT8|F2|AOAH|OSGIN1|RHBDL3|PCDH17|SPOCK3	http://amigo.geneontology.org/amigo/term/GO:0005509
	integral component of plasma membrane	Gene Ontology	GO:0005887	44	646	2.69768e-07	8.4977e-05	PTH1R|TMC5|TMC3|TSPAN13|AVPR1B|TRPC3|INSRR|TENM4|DSCAM|CYSLTR2|ROS1|LHCGR|ALCAM|GRPR|ADRB2|SLCO5A1|SCNN1A|SLC16A12|TRPM5|CLCN1|TRPV3|PCDH17|AQP5|ERBB4|SLC24A4|FSHR|CHRM2|SLC39A8|HTR7|SLC26A4|PROM1|SLC26A9|FFAR4|ADCY1|KCNH7|ADRA1D|ADCY8|GABRP|TLR3|RHAG|ADGRG2|HTR1D|NCMAP|CFTR	http://amigo.geneontology.org/amigo/term/GO:0005887
	extracellular region	Gene Ontology	GO:0005576	23	226	4.83468e-07	0.000133256	PTGFR|KNG1|LAG3|AGRN|ST14|WIF1|COL3A1|PAM|FNDC5|HTRA1|FGF19|CLSTN1|PROK2|FRZB|GPC5|CXCL12|FGF3|APOLD1|RSPO2|CFI|CCDC80|OGN|OTOR	http://amigo.geneontology.org/amigo/term/GO:0005576
	identical protein binding	Gene Ontology	GO:0042802	43	678	2.14405e-06	0.000525292	SDC3|AGR2|MGST2|FKBP6|TRIM55|PARK2|HTRA1|NCAM2|AHCYL1|TPD52|ALCAM|CBLN1|HNF1B|GMDS|PGR|GCC2|RASEF|PACSIN1|USH1G|GREM2|OTOP3|AQP5|HSPB1|YWHAG|FBN1|HID1|TMCC3|GIPC2|CASP6|KCNJ2|ADRA1D|IRF5|APP|ROBO2|C1QTNF6|TNFAIP3|E2F8|TLR3|ANGPTL4|MYBPC3|MMP9|ATP6V1C2|SOX10	http://amigo.geneontology.org/amigo/term/GO:0042802
	multicellular organism development	Gene Ontology	GO:0007275	18	172	5.8635e-06	0.00113226	SFRP2|AGRN|EYA2|SRF|FRZB|PIWIL1|SFRP5|CDH19|FSTL1|ERBB4|CDH20|FZD8|INSRR|EYA4|CDH6|FGF3|ROS1|PI15	http://amigo.geneontology.org/amigo/term/GO:0007275
	cell differentiation	Gene Ontology	GO:0030154	23	266	6.16197e-06	0.00113226	SPDEF|STYK1|AGRN|ROS1|FOXA1|FSTL1|FGF19|EYA4|RBM38|EYA2|ETV1|FRZB|RXRG|FEV|HCK|FGF3|SLA|SFRP2|ETV4|SYK|SDC3|NRG4|MEF2C	http://amigo.geneontology.org/amigo/term/GO:0030154
	chloride transmembrane transport	Gene Ontology	GO:1902476	11	74	2.17398e-05	0.00319575	CLIC6|CLCN1|GABRP|SLC12A8|ANO1|SLC26A4|SLC12A2|SLC1A4|SLC26A9|CFTR|BEST4	http://amigo.geneontology.org/amigo/term/GO:1902476
	extracellular matrix	Gene Ontology	GO:0031012	16	157	2.57499e-05	0.0035216	SPON1|TIMP4|LINGO3|WISP2|FBN2|FBN1|AGRN|COL3A1|COL1A2|MARCO|MMP9|ADAMTS20|ADAMTS18|WNT5A|WNT11|COL28A1	http://amigo.geneontology.org/amigo/term/GO:0031012
	cell surface receptor signaling pathway	Gene Ontology	GO:0007166	11	76	2.71507e-05	0.0035216	OSTN|PTH1R|CD36|LAG3|VIPR2|ADGRG2|MLKL|VIPR1|AGTR2|EDN3|GLP2R	http://amigo.geneontology.org/amigo/term/GO:0007166
	negative regulation of endopeptidase activity	Gene Ontology	GO:0010951	11	78	3.36868e-05	0.00407161	SPINT1|CPAMD8|APP|KNG1|AGRN|TIMP4|SERPINF1|COL28A1|SERPINF2|WFDC1|SERPIND1	http://amigo.geneontology.org/amigo/term/GO:0010951
	proteolysis	Gene Ontology	GO:0006508	21	258	3.53802e-05	0.00407161	CASP6|F2|ACE|LVRN|CFI|TMEM59|RHBDL3|ADAM28|TMPRSS13|CAPN5|TF|CPQ|GGT7|ST14|MMP9|ADAMTS20|ADAMTS18|SCRN1|PHEX|HTRA1|ADAM12	http://amigo.geneontology.org/amigo/term/GO:0006508
	canonical Wnt signaling pathway	Gene Ontology	GO:0060070	9	51	3.69307e-05	0.00407161	SFRP2|SFRP5|FRZB|FZD8|WNT9A|WNT5A|EGF|WNT11|WNT7B	http://amigo.geneontology.org/amigo/term/GO:0060070
	basolateral plasma membrane	Gene Ontology	GO:0016323	11	82	5.09105e-05	0.00482934	LIN7A|AQP4|CDH17|SLC2A9|ADCY8|PDPN|ATP1B1|SLC39A8|ATP1A1|STK39|ATP7B	http://amigo.geneontology.org/amigo/term/GO:0016323
	collagen-containing extracellular matrix	Gene Ontology	GO:0062023	11	82	5.09105e-05	0.00482934	F2|ELN|LTBP1|OMD|EFEMP1|SPARC|SPARCL1|ANGPTL5|ANGPTL4|GPC5|MYOC	http://amigo.geneontology.org/amigo/term/GO:0062023
	Golgi apparatus	Gene Ontology	GO:0005794	33	534	5.25643e-05	0.00482934	AVPR1B|PCSK9|CEP57|FAM3C|CD36|HEPACAM2|CPQ|MYOC|ADAM19|AP1AR|SLC39A11|TMED3|PHEX|GCNT2|PARK2|GCC2|ENTPD6|B3GALT2|TPST1|B3GNT7|UNC13B|GOLM1|GALNT7|CEP85|ST6GALNAC2|GALNT3|BACE2|GALNT12|PDXDC1|APP|ITM2B|ATP8B1|COLEC10	http://amigo.geneontology.org/amigo/term/GO:0005794
	receptor complex	Gene Ontology	GO:0043235	15	150	5.57316e-05	0.00491553	VIPR1|VDR|ERBB4|APP|IL12RB2|CD36|NT5DC3|ADRB2|PGR|INSRR|CSF3R|FSHR|GFRA1|ROS1|TLR7	http://amigo.geneontology.org/amigo/term/GO:0043235
	signaling receptor binding	Gene Ontology	GO:0005102	14	133	5.8993e-05	0.00500306	OSTN|RSPO2|STYK1|SYK|APP|KNG1|PDPN|SLA|ANGPTL4|FKBP1B|HCK|WIF1|NRG4|CADM1	http://amigo.geneontology.org/amigo/term/GO:0005102
	homophilic cell adhesion via plasma membrane adhesion molecules	Gene Ontology	GO:0007156	12	100	6.29525e-05	0.00514112	IGSF9B|CDH17|EMB|CDH19|ALCAM|ROBO2|CDH20|NEXN|DSCAM|CDH6|CLSTN1|PCDH17	http://amigo.geneontology.org/amigo/term/GO:0007156
	positive regulation of transcription by RNA polymerase II	Gene Ontology	GO:0045944	42	779	0.000102729	0.00776206	VDR|FOXA1|CSRNP1|AGRN|SOX9|OVOL2|MEOX1|MEF2C|KLF15|LHX8|MLLT6|PPARGC1A|PARK2|CBFB|PGR|NR5A2|MSX1|ETV1|ESRRG|IGF1|SRF|RXRG|BARX2|SERPINF2|GATA6|PROX1|SFRP2|TNIP2|ETV4|IRF5|LMO1|APP|SPDEF|E2F8|CREB3L2|TLR3|ADRB2|CREB3L1|TOX2|ABRA|WNT5A|SOX10	http://amigo.geneontology.org/amigo/term/GO:0045944
	microfibril	Gene Ontology	GO:0001527	4	6	0.000105606	0.00776206	MFAP5|FBN2|LTBP1|FBN1	http://amigo.geneontology.org/amigo/term/GO:0001527
	heparin binding	Gene Ontology	GO:0008201	10	75	0.000116174	0.00795026	GREM2|RSPO2|WISP2|APP|FBN1|AGRN|MSTN|TF|SMOC2|MUC1	http://amigo.geneontology.org/amigo/term/GO:0008201
	serine-type endopeptidase inhibitor activity	Gene Ontology	GO:0004867	8	47	0.000124821	0.00809503	SPINT1|APP|AGRN|SERPINF1|COL28A1|SERPINF2|WFDC1|SERPIND1	http://amigo.geneontology.org/amigo/term/GO:0004867
	positive regulation of stress fiber assembly	Gene Ontology	GO:0051496	7	36	0.000160122	0.00994277	PPM1E|EVL|ROCK2|SERPINF2|MYOC|TESK1|WNT11	http://amigo.geneontology.org/amigo/term/GO:0051496
	embryonic eye morphogenesis	Gene Ontology	GO:0048048	4	7	0.000162331	0.00994277	EFEMP1|MFAP5|FBN2|FBN1	http://amigo.geneontology.org/amigo/term/GO:0048048
	cell morphogenesis	Gene Ontology	GO:0000902	9	64	0.000176468	0.0105165	VDR|CDH19|PDPN|SHROOM3|CDH20|GREM1|MSX1|FRY|CDH6	http://amigo.geneontology.org/amigo/term/GO:0000902
