# Supplementary material for: Comparative Transcriptome Analysis Identifies Crucial Candidate Genes and Pathways in The Hypothalamic-Pituitary-Gonadal Axis During External Genitalia Development of Male Geese
Source: Research Square preprint supplement (doi:10.21203/rs.3.rs-892387/v1), 2021-10-05
Supplement: Supplementary file 2 [file 3114294e3a7a84be41d84f19.xlsx]

## Sheet: Table S1
Table S1: Sample quality control
Number	Group	Sample name	Tissue	concentration(ng/ul)	Volume(ul)	Total amount(ug)	RNA integrity number	Result
1	NEGG	NEGG-H1	hypothalamus	583	35	20.405	9.4	A
2	NEGG	NEGG-H2	hypothalamus	257	35	8.995	9.4	A
3	NEGG	NEGG-H3	hypothalamus	342	35	11.97	9.1	A
4	AEGG	AEGG-H1	hypothalamus	593	35	20.755	9.5	A
5	AEGG	AEGG-H2	hypothalamus	349	35	12.215	8.7	A
6	AEGG	AEGG-H3	hypothalamus	389	35	13.615	9.3	A
7	NEGG	NEGG-P1	pituitary gland	2278	35	79.73	9.5	A
8	NEGG	NEGG-P2	pituitary gland	1208	35	42.28	9.4	A
9	NEGG	NEGG-P3	pituitary gland	1301	35	45.535	9.1	A
10	AEGG	AEGG-P1	pituitary gland	1314	35	45.99	8.4	A
11	AEGG	AEGG-P2	pituitary gland	843	35	29.505	9.3	A
12	AEGG	AEGG-P3	pituitary gland	1405	35	49.175	9	A
13	NEGG	NEGG-T1	testis	1502	95	142.69	9.1	A
14	NEGG	NEGG-T2	testis	1562	95	148.39	9.7	A
15	NEGG	NEGG-T3	testis	1374	95	130.53	9	A
16	AEGG	AEGG-T1	testis	1098	95	104.31	9.1	A
17	AEGG	AEGG-T2	testis	993	95	94.335	8.5	A
18	AEGG	AEGG-T3	testis	1214	95	115.33	9	A
19	NEGG	NEGG-G1	external genitalia	680	35	23.8	8.3	A
20	NEGG	NEGG-G2	external genitalia	743	35	26.005	8.8	A
21	NEGG	NEGG-G3	external genitalia	1022	35	35.77	8.7	A
22	AEGG	AEGG-G1	external genitalia	658	35	23.03	9.4	A
23	AEGG	AEGG-G2	external genitalia	1459	35	51.065	7.9	A
24	AEGG	AEGG-G3	external genitalia	406	35	14.21	7.6	A
