# Supplementary material for: Comparative Transcriptome Analysis Identifies Crucial Candidate Genes and Pathways in The Hypothalamic-Pituitary-Gonadal Axis During External Genitalia Development of Male Geese
Source: Research Square preprint supplement (doi:10.21203/rs.3.rs-892387/v1), 2021-10-05
Supplement: Supplementary file 6 [file 3ab42825618deb901a9e8a00.xlsx]

## Sheet: Table S4
Table S4: Top 30 KEGG pathways enriched by the DEGs in different tissues and related information
Tissue	#Term	Database	ID	Input number	Background number	P-Value	Corrected P-Value	Input	Hyperlink
hypothalamus	ECM-receptor interaction	KEGG PATHWAY	gga04512	3	83	0.000537391	0.0303469	ITGA2B|FREM1|COL9A1	http://www.genome.jp/kegg-bin/show_pathway?gga04512/gga:771873%09red/gga:101749783%09red/gga:427355%09red
	Purine metabolism	KEGG PATHWAY	gga00230	2	125	0.0229661	0.0801596	AMPD1|PDE6H	http://www.genome.jp/kegg-bin/show_pathway?gga00230/gga:378929%09red/gga:772125%09red
	Phototransduction	KEGG PATHWAY	gga04744	1	23	0.0433331	0.0937699	GNAT2	http://www.genome.jp/kegg-bin/show_pathway?gga04744/gga:395425%09red
	Focal adhesion	KEGG PATHWAY	gga04510	2	189	0.0483824	0.0999427	ITGA2B|COL9A1	http://www.genome.jp/kegg-bin/show_pathway?gga04510/gga:771873%09red/gga:101749783%09red
	Regulation of actin cytoskeleton	KEGG PATHWAY	gga04810	2	190	0.0488356	0.0999427	ITGA2B|FGF18	http://www.genome.jp/kegg-bin/show_pathway?gga04810/gga:395453%09red/gga:101749783%09red
	Arginine and proline metabolism	KEGG PATHWAY	gga00330	1	42	0.0763319	0.124393	AZIN2	http://www.genome.jp/kegg-bin/show_pathway?gga00330/gga:428228%09red
	Cytosolic DNA-sensing pathway	KEGG PATHWAY	gga04623	1	44	0.07974	0.125306	IKBKE	http://www.genome.jp/kegg-bin/show_pathway?gga04623/gga:430480%09red
	MAPK signaling pathway	KEGG PATHWAY	gga04010	2	261	0.0846168	0.130964	FGF18|HSPB1	http://www.genome.jp/kegg-bin/show_pathway?gga04010/gga:396227%09red/gga:395453%09red
	Glutathione metabolism	KEGG PATHWAY	gga00480	1	47	0.0848292	0.130964	ANPEP	http://www.genome.jp/kegg-bin/show_pathway?gga00480/gga:395667%09red
	RIG-I-like receptor signaling pathway	KEGG PATHWAY	gga04622	1	57	0.101595	0.142666	IKBKE	http://www.genome.jp/kegg-bin/show_pathway?gga04622/gga:430480%09red
	VEGF signaling pathway	KEGG PATHWAY	gga04370	1	58	0.103255	0.142719	HSPB1	http://www.genome.jp/kegg-bin/show_pathway?gga04370/gga:396227%09red
	PPAR signaling pathway	KEGG PATHWAY	gga03320	1	64	0.113153	0.153981	PLIN1	http://www.genome.jp/kegg-bin/show_pathway?gga03320/gga:415487%09red
	Toll-like receptor signaling pathway	KEGG PATHWAY	gga04620	1	84	0.145379	0.182762	IKBKE	http://www.genome.jp/kegg-bin/show_pathway?gga04620/gga:430480%09red
	C-type lectin receptor signaling pathway	KEGG PATHWAY	gga04625	1	87	0.150113	0.187819	IKBKE	http://www.genome.jp/kegg-bin/show_pathway?gga04625/gga:430480%09red
	Vascular smooth muscle contraction	KEGG PATHWAY	gga04270	1	117	0.196067	0.237067	NPPC	http://www.genome.jp/kegg-bin/show_pathway?gga04270/gga:419487%09red
	Apelin signaling pathway	KEGG PATHWAY	gga04371	1	119	0.199042	0.23777	PLIN1	http://www.genome.jp/kegg-bin/show_pathway?gga04371/gga:415487%09red
	NOD-like receptor signaling pathway	KEGG PATHWAY	gga04621	1	124	0.206435	0.242863	IKBKE	http://www.genome.jp/kegg-bin/show_pathway?gga04621/gga:430480%09red
	Metabolic pathways	KEGG PATHWAY	gga01100	4	1290	0.214367	0.248214	PDE6H|AMPD1|ANPEP|AZIN2	http://www.genome.jp/kegg-bin/show_pathway?gga01100/gga:378929%09red/gga:428228%09red/gga:772125%09red/gga:395667%09red
	Phagosome	KEGG PATHWAY	gga04145	1	132	0.218124	0.251461	MARCO	http://www.genome.jp/kegg-bin/show_pathway?gga04145/gga:395488%09red
	Influenza A	KEGG PATHWAY	gga05164	1	135	0.222464	0.25535	IKBKE	http://www.genome.jp/kegg-bin/show_pathway?gga05164/gga:430480%09red
	Herpes simplex virus 1 infection	KEGG PATHWAY	gga05168	1	150	0.243813	0.276251	IKBKE	http://www.genome.jp/kegg-bin/show_pathway?gga05168/gga:430480%09red
	Cytokine-cytokine receptor interaction	KEGG PATHWAY	gga04060	1	202	0.313479	0.34627	IL12RB1	http://www.genome.jp/kegg-bin/show_pathway?gga04060/gga:101749221%09red
	Neuroactive ligand-receptor interaction	KEGG PATHWAY	gga04080	1	333	0.462353	0.478671	IAPP	http://www.genome.jp/kegg-bin/show_pathway?gga04080/gga:396362%09red
pituitary gland	ECM-receptor interaction	KEGG PATHWAY	gga04512	7	83	2.41909e-06	0.000337498	LAMA1|CHAD|SDC1|THBS4|THBS1|SPP1|LAMC2	http://www.genome.jp/kegg-bin/show_pathway?gga04512/gga:396306%09red/gga:395210%09red/gga:769665%09red/gga:373987%09red/gga:374016%09red/gga:421960%09red/gga:408043%09red
	Focal adhesion	KEGG PATHWAY	gga04510	9	189	7.63935e-06	0.000800222	PGF|LAMA1|CHAD|THBS4|THBS1|VEGFA|LAMC2|SPP1|FLNB	http://www.genome.jp/kegg-bin/show_pathway?gga04510/gga:396306%09red/gga:395210%09red/gga:769665%09red/gga:395909%09red/gga:373987%09red/gga:374016%09red/gga:408043%09red/gga:771832%09red/gga:378913%09red
	Neuroactive ligand-receptor interaction	KEGG PATHWAY	gga04080	10	333	0.000107274	0.00642111	FSHB|RXFP3|SSTR1|SSTR2|CHRNA2|GABRE|TSHR|CALCB|ADCYAP1R1|GRM3	http://www.genome.jp/kegg-bin/show_pathway?gga04080/gga:395305%09red/gga:396256%09red/gga:418644%09red/gga:431664%09red/gga:395607%09red/gga:396173%09red/gga:771648%09red/gga:428900%09red/gga:374108%09red/gga:420386%09red
	p53 signaling pathway	KEGG PATHWAY	gga04115	3	66	0.011064	0.114665	CDK1|TP73|THBS1	http://www.genome.jp/kegg-bin/show_pathway?gga04115/gga:396252%09red/gga:373987%09red/gga:419382%09red
	GnRH signaling pathway	KEGG PATHWAY	gga04912	3	84	0.0205274	0.170317	CALML4|CAMK2A|FSHB	http://www.genome.jp/kegg-bin/show_pathway?gga04912/gga:427515%09red/gga:374175%09red/gga:374108%09red
	Oocyte meiosis	KEGG PATHWAY	gga04114	3	99	0.0309512	0.173122	CDK1|CAMK2A|CALML4	http://www.genome.jp/kegg-bin/show_pathway?gga04114/gga:396252%09red/gga:427515%09red/gga:374175%09red
	MAPK signaling pathway	KEGG PATHWAY	gga04010	5	261	0.0331953	0.173122	PGF|VEGFA|FLNB|FGF3|HSPB1	http://www.genome.jp/kegg-bin/show_pathway?gga04010/gga:396227%09red/gga:771832%09red/gga:396267%09red/gga:395909%09red/gga:378913%09red
	Calcium signaling pathway	KEGG PATHWAY	gga04020	4	180	0.0350408	0.173122	PDE1A|CAMK2A|CAMK1G|CALML4	http://www.genome.jp/kegg-bin/show_pathway?gga04020/gga:427515%09red/gga:374175%09red/gga:424116%09red/gga:419859%09red
	Ether lipid metabolism	KEGG PATHWAY	gga00565	2	44	0.0377899	0.173122	GAL3ST1|ENPP2	http://www.genome.jp/kegg-bin/show_pathway?gga00565/gga:420361%09red/gga:417006%09red
	Apelin signaling pathway	KEGG PATHWAY	gga04371	3	119	0.0483963	0.173122	GNG4|SPP1|CALML4	http://www.genome.jp/kegg-bin/show_pathway?gga04371/gga:427515%09red/gga:395210%09red/gga:771582%09red
	Cytokine-cytokine receptor interaction	KEGG PATHWAY	gga04060	4	202	0.049484	0.173122	CX3CL1|EDA2R|CXCL14|CCR7	http://www.genome.jp/kegg-bin/show_pathway?gga04060/gga:395451%09red/gga:428315%09red/gga:415651%09red/gga:422166%09red
	Purine metabolism	KEGG PATHWAY	gga00230	3	125	0.0543934	0.173122	PDE1A|ENTPD3|PDE10A	http://www.genome.jp/kegg-bin/show_pathway?gga00230/gga:428447%09red/gga:424116%09red/gga:421574%09red
	Adrenergic signaling in cardiomyocytes	KEGG PATHWAY	gga04261	3	128	0.0575194	0.173122	CREB5|CAMK2A|CALML4	http://www.genome.jp/kegg-bin/show_pathway?gga04261/gga:427515%09red/gga:374175%09red/gga:428435%09red
	VEGF signaling pathway	KEGG PATHWAY	gga04370	2	58	0.0608656	0.173436	VEGFA|HSPB1	http://www.genome.jp/kegg-bin/show_pathway?gga04370/gga:396227%09red/gga:395909%09red
	Taurine and hypotaurine metabolism	KEGG PATHWAY	gga00430	1	10	0.0709886	0.173436	GADL1	http://www.genome.jp/kegg-bin/show_pathway?gga00430/gga:100857134%09red
	Non-homologous end-joining	KEGG PATHWAY	gga03450	1	12	0.0833467	0.179549	NHEJ1	http://www.genome.jp/kegg-bin/show_pathway?gga03450/gga:424205%09red
	Glycosphingolipid biosynthesis - ganglio series	KEGG PATHWAY	gga00604	1	14	0.0955414	0.187319	ST6GALNAC3	http://www.genome.jp/kegg-bin/show_pathway?gga00604/gga:404746%09red
	Pantothenate and CoA biosynthesis	KEGG PATHWAY	gga00770	1	15	0.101578	0.191287	GADL1	http://www.genome.jp/kegg-bin/show_pathway?gga00770/gga:100857134%09red
	Nitrogen metabolism	KEGG PATHWAY	gga00910	1	17	0.113532	0.194163	CA6	http://www.genome.jp/kegg-bin/show_pathway?gga00910/gga:428187%09red
	Arginine biosynthesis	KEGG PATHWAY	gga00220	1	17	0.113532	0.194163	ASS1	http://www.genome.jp/kegg-bin/show_pathway?gga00220/gga:417185%09red
	Glycosaminoglycan degradation	KEGG PATHWAY	gga00531	1	18	0.119449	0.199003	SPAM1	http://www.genome.jp/kegg-bin/show_pathway?gga00531/gga:417749%09red
	TGF-beta signaling pathway	KEGG PATHWAY	gga04350	2	90	0.125737	0.20701	FMOD|THBS1	http://www.genome.jp/kegg-bin/show_pathway?gga04350/gga:373987%09red/gga:395814%09red
	Melanogenesis	KEGG PATHWAY	gga04916	2	91	0.127964	0.210263	CAMK2A|CALML4	http://www.genome.jp/kegg-bin/show_pathway?gga04916/gga:427515%09red/gga:374175%09red
	Phototransduction	KEGG PATHWAY	gga04744	1	23	0.148453	0.227014	CALML4	http://www.genome.jp/kegg-bin/show_pathway?gga04744/gga:427515%09red
	Glycosaminoglycan biosynthesis - heparan sulfate / heparin	KEGG PATHWAY	gga00534	1	24	0.154139	0.232317	NDST4	http://www.genome.jp/kegg-bin/show_pathway?gga00534/gga:422686%09red
	Metabolic pathways	KEGG PATHWAY	gga01100	12	1290	0.16093	0.237847	LCT|ENTPD3|ASS1|ALOX5|NDST4|CA6|SPAM1|GAL3ST1|GADL1|ST6GALNAC3|PDE10A|PDE1A	http://www.genome.jp/kegg-bin/show_pathway?gga01100/gga:422686%09red/gga:423769%09red/gga:417749%09red/gga:100857134%09red/gga:428187%09red/gga:417006%09red/gga:424294%09red/gga:424116%09red/gga:428447%09red/gga:404746%09red/gga:417185%09red/gga:421574%09red
	Cell cycle	KEGG PATHWAY	gga04110	2	114	0.18133	0.252937	CDK1|MCM3	http://www.genome.jp/kegg-bin/show_pathway?gga04110/gga:396252%09red/gga:422043%09red
	beta-Alanine metabolism	KEGG PATHWAY	gga00410	1	29	0.182006	0.252937	GADL1	http://www.genome.jp/kegg-bin/show_pathway?gga00410/gga:100857134%09red
	Vascular smooth muscle contraction	KEGG PATHWAY	gga04270	2	117	0.188526	0.256886	CALCB|CALML4	http://www.genome.jp/kegg-bin/show_pathway?gga04270/gga:427515%09red/gga:396256%09red
	DNA replication	KEGG PATHWAY	gga03030	1	31	0.192896	0.260301	MCM3	http://www.genome.jp/kegg-bin/show_pathway?gga03030/gga:422043%09red
testis	Neuroactive ligand-receptor interaction	KEGG PATHWAY	gga04080	29	333	1.23196e-08	4.11476e-06	HTR5A|ADORA1|GABRR3|NTSR1|TRHR|CCK|GRPR|CCKBR|CHRNB3|SSTR3|VIPR2|VIPR1|NPY|GPR83|GRM2|IAPP|NPFFR1|CHRNA6|P2RY2|GCGR|GHSR|NTS|GALR3|GALR1|SSTR5|HCRTR2|LPAR6|CALCR|HTR1B	http://www.genome.jp/kegg-bin/show_pathway?gga04080/gga:396321%09red/gga:417883%09red/gga:395770%09red/gga:425670%09red/gga:395329%09red/gga:428644%09red/gga:428409%09red/gga:430981%09red/gga:428425%09red/gga:427575%09red/gga:378911%09red/gga:427907%09red/gga:396464%09red/gga:427904%09red/gga:428093%09red/gga:374212%09red/gga:421858%09red/gga:396118%09red/gga:414884%09red/gga:414885%09red/gga:428…
	Cell cycle	KEGG PATHWAY	gga04110	11	114	0.00018867	0.0105026	CCNB3|CCNB2|BUB1|CCNA1|PLK1|BUB1B|CDC20|SFN|CDK1|MCM3|CDC45	http://www.genome.jp/kegg-bin/show_pathway?gga04110/gga:396252%09red/gga:396167%09red/gga:422043%09red/gga:418901%09red/gga:416776%09red/gga:416575%09red/gga:378922%09red/gga:424563%09red/gga:415400%09red/gga:408037%09red/gga:421226%09red
	Oocyte meiosis	KEGG PATHWAY	gga04114	10	99	0.000261191	0.0128291	CCNB2|BUB1|FBXO43|PLK1|PLCZ1|CAMK2A|CALML4|CDK1|AURKA|CDC20	http://www.genome.jp/kegg-bin/show_pathway?gga04114/gga:396252%09red/gga:374175%09red/gga:424563%09red/gga:428167%09red/gga:418182%09red/gga:416575%09red/gga:415400%09red/gga:420245%09red/gga:427515%09red/gga:421226%09red
	Purine metabolism	KEGG PATHWAY	gga00230	11	125	0.000392846	0.0160013	ENTPD5|PRPS2|FHIT|PNP|PDE1A|AK7|AK9|PDE6B|RRM2|NT5C1A|DCK	http://www.genome.jp/kegg-bin/show_pathway?gga00230/gga:769958%09red/gga:419675%09red/gga:423343%09red/gga:771077%09red/gga:422648%09red/gga:418639%09red/gga:424116%09red/gga:421936%09red/gga:416071%09red/gga:395092%09red/gga:428907%09red
	Phototransduction	KEGG PATHWAY	gga04744	5	23	0.00045128	0.0179438	PDE6B|SLC24A1|GUCA1A|GNAT2|CALML4	http://www.genome.jp/kegg-bin/show_pathway?gga04744/gga:427515%09red/gga:395425%09red/gga:414892%09red/gga:374216%09red/gga:395092%09red
	Pyrimidine metabolism	KEGG PATHWAY	gga00240	7	59	0.000919102	0.0270751	ENTPD5|DCK|PNP|AK9|DPYS|RRM2|NT5C1A	http://www.genome.jp/kegg-bin/show_pathway?gga00240/gga:769958%09red/gga:419675%09red/gga:423343%09red/gga:771077%09red/gga:422648%09red/gga:421936%09red/gga:420266%09red
	Progesterone-mediated oocyte maturation	KEGG PATHWAY	gga04914	8	78	0.000969219	0.0270751	CCNB3|CCNB2|BUB1|CCNA1|PLK1|CDK1|MAPK10|AURKA	http://www.genome.jp/kegg-bin/show_pathway?gga04914/gga:396252%09red/gga:422592%09red/gga:428167%09red/gga:418901%09red/gga:416575%09red/gga:415400%09red/gga:396167%09red/gga:421226%09red
	Melanogenesis	KEGG PATHWAY	gga04916	8	91	0.00239771	0.050612	WNT3A|WNT2B|WNT10A|WNT6|CAMK2A|CALML4|LEF1|DCT	http://www.genome.jp/kegg-bin/show_pathway?gga04916/gga:374175%09red/gga:395396%09red/gga:395235%09red/gga:395775%09red/gga:374243%09red/gga:427515%09red/gga:429040%09red/gga:395865%09red
	Arginine and proline metabolism	KEGG PATHWAY	gga00330	5	42	0.00487836	0.0783352	CKMT2|GATM|ARG2|AZIN2|AGMAT	http://www.genome.jp/kegg-bin/show_pathway?gga00330/gga:373942%09red/gga:396508%09red/gga:423272%09red/gga:428228%09red/gga:395504%09red
	Calcium signaling pathway	KEGG PATHWAY	gga04020	11	180	0.00587811	0.0892404	CCKBR|HTR5A|PLCZ1|PDE1A|CAMK2A|CALML4|TRHR|TNNC1|TNNC2|GRPR|NTSR1	http://www.genome.jp/kegg-bin/show_pathway?gga04020/gga:414885%09red/gga:374175%09red/gga:428409%09red/gga:428149%09red/gga:418182%09red/gga:395770%09red/gga:424116%09red/gga:396032%09red/gga:396434%09red/gga:378928%09red/gga:427515%09red
	Wnt signaling pathway	KEGG PATHWAY	gga04310	9	141	0.00942469	0.114917	WNT3A|WNT2B|LGR6|SFRP5|WNT10A|WNT6|CAMK2A|MAPK10|LEF1	http://www.genome.jp/kegg-bin/show_pathway?gga04310/gga:422592%09red/gga:374175%09red/gga:395396%09red/gga:423838%09red/gga:395235%09red/gga:374243%09red/gga:421173%09red/gga:429040%09red/gga:395865%09red
	Cardiac muscle contraction	KEGG PATHWAY	gga04260	5	66	0.0262081	0.179603	CACNG1|MYL4|TNNT2|CACNG2|TNNC1	http://www.genome.jp/kegg-bin/show_pathway?gga04260/gga:396433%09red/gga:396032%09red/gga:396472%09red/gga:427909%09red/gga:417428%09red
	p53 signaling pathway	KEGG PATHWAY	gga04115	5	66	0.0262081	0.179603	SFN|CCNB2|SERPINB5|RRM2|CDK1	http://www.genome.jp/kegg-bin/show_pathway?gga04115/gga:396252%09red/gga:420900%09red/gga:408037%09red/gga:421936%09red/gga:415400%09red
	Adrenergic signaling in cardiomyocytes	KEGG PATHWAY	gga04261	7	128	0.041335	0.23937	TNNT2|CAMK2A|CALML4|MYL4|TNNC1|CACNG1|CACNG2	http://www.genome.jp/kegg-bin/show_pathway?gga04261/gga:374175%09red/gga:427909%09red/gga:396472%09red/gga:417428%09red/gga:396433%09red/gga:396032%09red/gga:427515%09red
	Intestinal immune network for IgA production	KEGG PATHWAY	gga04672	3	36	0.0639408	0.322352	CCL28|TNFSF13B|CCR9	http://www.genome.jp/kegg-bin/show_pathway?gga04672/gga:428454%09red/gga:374229%09red/gga:107049316%09red
	Biosynthesis of amino acids	KEGG PATHWAY	gga01230	4	60	0.0644705	0.322352	TAT|ARG2|PRPS2|PHGDH	http://www.genome.jp/kegg-bin/show_pathway?gga01230/gga:423272%09red/gga:424381%09red/gga:418639%09red/gga:415884%09red
	Glycine, serine and threonine metabolism	KEGG PATHWAY	gga00260	3	37	0.0679624	0.330896	GATM|AGXT|PHGDH	http://www.genome.jp/kegg-bin/show_pathway?gga00260/gga:770344%09red/gga:424381%09red/gga:395504%09red
	Cysteine and methionine metabolism	KEGG PATHWAY	gga00270	3	43	0.0943624	0.401199	TAT|CDO1|PHGDH	http://www.genome.jp/kegg-bin/show_pathway?gga00270/gga:415884%09red/gga:424381%09red/gga:427391%09red
	Sphingolipid metabolism	KEGG PATHWAY	gga00600	3	45	0.103967	0.401199	NEU4|ACER1|B4GALT6	http://www.genome.jp/kegg-bin/show_pathway?gga00600/gga:421092%09red/gga:420088%09red/gga:429131%09red
	Glycosphingolipid biosynthesis - lacto and neolacto series	KEGG PATHWAY	gga00601	2	23	0.11694	0.401199	FUT9|GCNT2	http://www.genome.jp/kegg-bin/show_pathway?gga00601/gga:771133%09red/gga:428479%09red
	Metabolic pathways	KEGG PATHWAY	gga01100	38	1290	0.127636	0.401199	FHIT|PLCZ1|CDO1|RRM2|PLA2G1B|AGXT|AANAT|AZIN2|TAT|ACER1|PRPS2|DCK|GCNT2|PDE1A|DPYS|GATM|NT5C1A|DCT|HNMT|B4GALT6|LIPC|PHGDH|AGMAT|RFK|GK|HPSE|AK9|PCYT1B|ATP4B|CKMT2|PNP|ARG2|AK7|KL|PDE6B|ENTPD5|HAO1|FUT9	http://www.genome.jp/kegg-bin/show_pathway?gga01100/gga:422648%09red/gga:416728%09red/gga:420266%09red/gga:420088%09red/gga:421936%09red/gga:416071%09red/gga:418594%09red/gga:424381%09red/gga:396066%09red/gga:418909%09red/gga:421092%09red/gga:769958%09red/gga:427495%09red/gga:419675%09red/gga:415884%09red/gga:416980%09red/gga:395092%09red/gga:428228%09red/gga:771133%09red/gga:771077%09red/gga:418…
	Phenylalanine, tyrosine and tryptophan biosynthesis	KEGG PATHWAY	gga00400	1	5	0.133536	0.401199	TAT	http://www.genome.jp/kegg-bin/show_pathway?gga00400/gga:415884%09red
	Cellular senescence	KEGG PATHWAY	gga04218	6	143	0.141645	0.401199	CCNB3|CCNB2|CCNA1|CALML4|CDK1|FOXM1	http://www.genome.jp/kegg-bin/show_pathway?gga04218/gga:396252%09red/gga:430534%09red/gga:418901%09red/gga:415400%09red/gga:427515%09red/gga:396167%09red
	Phosphonate and phosphinate metabolism	KEGG PATHWAY	gga00440	1	7	0.173968	0.407239	PCYT1B	http://www.genome.jp/kegg-bin/show_pathway?gga00440/gga:418594%09red
	Nicotinate and nicotinamide metabolism	KEGG PATHWAY	gga00760	2	31	0.18262	0.408984	PNP|NT5C1A	http://www.genome.jp/kegg-bin/show_pathway?gga00760/gga:769958%09red/gga:419675%09red
	Glyoxylate and dicarboxylate metabolism	KEGG PATHWAY	gga00630	2	31	0.18262	0.408984	HAO1|AGXT	http://www.genome.jp/kegg-bin/show_pathway?gga00630/gga:770344%09red/gga:416728%09red
	FoxO signaling pathway	KEGG PATHWAY	gga04068	5	123	0.185876	0.408984	CCNB3|CCNB2|RAG1|MAPK10|PLK1	http://www.genome.jp/kegg-bin/show_pathway?gga04068/gga:423164%09red/gga:422592%09red/gga:396167%09red/gga:416575%09red/gga:415400%09red
	Riboflavin metabolism	KEGG PATHWAY	gga00740	1	8	0.193471	0.408984	RFK	http://www.genome.jp/kegg-bin/show_pathway?gga00740/gga:427259%09red
	Tyrosine metabolism	KEGG PATHWAY	gga00350	2	34	0.208461	0.416062	TAT|DCT	http://www.genome.jp/kegg-bin/show_pathway?gga00350/gga:395775%09red/gga:415884%09red
	Ubiquinone and other terpenoid-quinone biosynthesis	KEGG PATHWAY	gga00130	1	9	0.212515	0.416062	TAT	http://www.genome.jp/kegg-bin/show_pathway?gga00130/gga:415884%09red
external genitalia	Mucin type O-glycan biosynthesis	KEGG PATHWAY	gga00512	8	28	4.91918e-06	0.00108468	GALNT12|GCNT3|GCNT1|GALNT4|GALNT5|GALNT7|ST6GALNAC1|GALNT3	http://www.genome.jp/kegg-bin/show_pathway?gga00512/gga:427492%09red/gga:427260%09red/gga:424324%09red/gga:420978%09red/gga:424177%09red/gga:112533346%09red/gga:396168%09red/gga:422561%09red
	Purine metabolism	KEGG PATHWAY	gga00230	15	125	7.90564e-06	0.00134092	ENTPD6|NME7|ADCY1|NUDT9|ADCY8|ENPP3|ENTPD8|PAPSS2|NT5C1A|ADA|PDE4B|PPAT|NT5DC4|ADSSL1|PDE5A	http://www.genome.jp/kegg-bin/show_pathway?gga00230/gga:424700%09red/gga:419194%09red/gga:100858145%09red/gga:416708%09red/gga:374095%09red/gga:426928%09red/gga:422587%09red/gga:422677%09red/gga:776127%09red/gga:100858617%09red/gga:422743%09red/gga:420788%09red/gga:419675%09red/gga:420328%09red/gga:423678%09red
	Neuroactive ligand-receptor interaction	KEGG PATHWAY	gga04080	26	333	8.60649e-06	0.00135552	PTH1R|AVPR1B|PTGFR|GABRR3|GPR50|CRH|CYSLTR2|LHCGR|GRIN3B|VIPR2|FSHR|EDN3|VIPR1|CHRM2|HTR7|GRPR|ADRA1A|F2|ADRA1D|GRIK2|KNG1|GABRP|ADRB2|HTR1D|AGTR2|GLP2R	http://www.genome.jp/kegg-bin/show_pathway?gga04080/gga:395776%09red/gga:422933%09red/gga:404297%09red/gga:428708%09red/gga:429171%09red/gga:420401%09red/gga:416174%09red/gga:428628%09red/gga:423794%09red/gga:395306%09red/gga:430981%09red/gga:428263%09red/gga:418126%09red/gga:428071%09red/gga:396318%09red/gga:768509%09red/gga:428203%09red/gga:424548%09red/gga:769107%09red/gga:395329%09red/gga:395…
	Adrenergic signaling in cardiomyocytes	KEGG PATHWAY	gga04261	14	128	4.02739e-05	0.00422876	ADRA1A|PLCB1|ADRA1D|PPP2R3B|ADCY8|CAMK2A|ATP1B1|CREB3L2|ADRB2|CREB3L1|ATP1A1|CACNA2D3|AGTR2|ADCY1	http://www.genome.jp/kegg-bin/show_pathway?gga04261/gga:374175%09red/gga:396530%09red/gga:422933%09red/gga:418123%09red/gga:418670%09red/gga:428708%09red/gga:415996%09red/gga:427623%09red/gga:100859610%09red/gga:427687%09red/gga:428203%09red/gga:420788%09red/gga:396529%09red/gga:420328%09red
	Wnt signaling pathway	KEGG PATHWAY	gga04310	14	141	0.00010478	0.00776206	SFRP2|PLCB1|RSPO2|FZD8|SFRP5|CAMK2A|ROCK2|WIF1|SERPINF1|CTNND2|WNT9A|WNT5A|WNT11|WNT7B	http://www.genome.jp/kegg-bin/show_pathway?gga04310/gga:395829%09red/gga:395703%09red/gga:420271%09red/gga:374182%09red/gga:395546%09red/gga:423838%09red/gga:374175%09red/gga:417561%09red/gga:374059%09red/gga:427937%09red/gga:417831%09red/gga:420922%09red/gga:427687%09red/gga:395562%09red
	Calcium signaling pathway	KEGG PATHWAY	gga04020	16	180	0.000115434	0.00795026	AVPR1B|PLCB1|PTGFR|ADRA1D|ERBB4|LHCGR|ADRA1A|ADCY8|CHRM2|CAMK2A|HTR7|ADRB2|GRPR|PPIF|CYSLTR2|ADCY1	http://www.genome.jp/kegg-bin/show_pathway?gga04020/gga:423794%09red/gga:423723%09red/gga:424548%09red/gga:422933%09red/gga:428263%09red/gga:418126%09red/gga:428071%09red/gga:378928%09red/gga:427623%09red/gga:395776%09red/gga:427687%09red/gga:395671%09red/gga:374175%09red/gga:420788%09red/gga:428203%09red/gga:420328%09red
	Melanogenesis	KEGG PATHWAY	gga04916	11	91	0.000118983	0.00795026	PLCB1|ADCY1|FZD8|ADCY8|CAMK2A|CREB3L2|CREB3L1|WNT9A|WNT5A|WNT11|WNT7B	http://www.genome.jp/kegg-bin/show_pathway?gga04916/gga:395829%09red/gga:395703%09red/gga:418123%09red/gga:374059%09red/gga:395562%09red/gga:374175%09red/gga:427937%09red/gga:100859610%09red/gga:427687%09red/gga:420788%09red/gga:420328%09red
	Metabolic pathways	KEGG PATHWAY	gga01100	60	1290	0.000195278	0.0113312	NADK|GALNT7|B4GALNT3|NAGA|NMRK2|H6PD|NQO1|MGST2|GNE|BLVRA|PAPSS2|AHCYL1|GCNT3|GCNT2|GALNT12|ATP6AP1|SARDH|HPGDS|CMAS|GMDS|MGAT5B|NT5C1A|ATP6V0D2|NUDT9|NT5DC4|HSD11B2|PDE5A|ENTPD6|B3GALT2|GPX2|PLCB1|CA12|ENTPD8|GALE|GGT7|ENPP3|AGMAT|GALNT4|GALNT5|ADSSL1|PGM3|NANS|ST6GALNAC1|GALNT3|PAFAH2|NME7|SDSL|ADCY1|GPT2|PIP5K1B|GCNT1|ADCY8|ATP6V0A4|ADA|PPAT|BST1|ATP6V1C2|PDE4B|GFPT1|FUT9	http://www.genome.jp/kegg-bin/show_pathway?gga01100/gga:419403%09red/gga:428188%09red/gga:418199%09red/gga:100858145%09red/gga:416708%09red/gga:424324%09red/gga:420890%09red/gga:426928%09red/gga:427801%09red/gga:100858361%09red/gga:419686%09red/gga:427285%09red/gga:396168%09red/gga:427283%09red/gga:112533346%09red/gga:769122%09red/gga:427854%09red/gga:415746%09red/gga:423678%09red/gga:427492%09re…
	Nicotinate and nicotinamide metabolism	KEGG PATHWAY	gga00760	6	31	0.000483434	0.0222078	NADK|NMRK2|ENPP3|BST1|NT5C1A|NT5DC4	http://www.genome.jp/kegg-bin/show_pathway?gga00760/gga:419403%09red/gga:422828%09red/gga:419675%09red/gga:426928%09red/gga:100858798%09red/gga:100858617%09red
	Amino sugar and nucleotide sugar metabolism	KEGG PATHWAY	gga00520	7	48	0.000757918	0.0321386	PGM3|CMAS|GALE|GMDS|GNE|GFPT1|NANS	http://www.genome.jp/kegg-bin/show_pathway?gga00520/gga:418199%09red/gga:421841%09red/gga:420890%09red/gga:419514%09red/gga:419686%09red/gga:427285%09red/gga:427283%09red
	Vascular smooth muscle contraction	KEGG PATHWAY	gga04270	10	117	0.00277403	0.0685908	AVPR1B|PLCB1|ADRA1D|ADRA1A|ADCY8|ROCK2|PRKG1|PRKCQ|EDN3|ADCY1	http://www.genome.jp/kegg-bin/show_pathway?gga04270/gga:422933%09red/gga:374182%09red/gga:776459%09red/gga:428263%09red/gga:423682%09red/gga:768509%09red/gga:427687%09red/gga:428203%09red/gga:420788%09red/gga:420328%09red
	Pyrimidine metabolism	KEGG PATHWAY	gga00240	6	59	0.00897867	0.122969	ENTPD6|NME7|ENPP3|ENTPD8|NT5C1A|NT5DC4	http://www.genome.jp/kegg-bin/show_pathway?gga00240/gga:100858145%09red/gga:416708%09red/gga:374095%09red/gga:426928%09red/gga:100858617%09red/gga:419675%09red
	Cell adhesion molecules (CAMs)	KEGG PATHWAY	gga04514	9	122	0.0105687	0.136548	CLDN10|ALCAM|SDC3|CNTN2|VCAM1|OCLN|CLDN3|NCAM2|CADM1	http://www.genome.jp/kegg-bin/show_pathway?gga04514/gga:419825%09red/gga:427968%09red/gga:419762%09red/gga:424467%09red/gga:374029%09red/gga:396092%09red/gga:396026%09red/gga:418790%09red/gga:396343%09red
	ECM-receptor interaction	KEGG PATHWAY	gga04512	7	83	0.0122473	0.140924	COL4A3|GP1BA|CD36|AGRN|COL1A2|LAMC3|SV2C	http://www.genome.jp/kegg-bin/show_pathway?gga04512/gga:396243%09red/gga:396538%09red/gga:100857333%09red/gga:417180%09red/gga:424797%09red/gga:431597%09red/gga:417730%09red
	Alanine, aspartate and glutamate metabolism	KEGG PATHWAY	gga00250	4	34	0.0201776	0.159154	GFPT1|ADSSL1|PPAT|GPT2	http://www.genome.jp/kegg-bin/show_pathway?gga00250/gga:422743%09red/gga:776127%09red/gga:415746%09red/gga:419514%09red
	mTOR signaling pathway	KEGG PATHWAY	gga04150	9	140	0.0226918	0.167634	CAB39L|IGF1|FZD8|CLIP1|WNT9A|ATP6V1C2|WNT5A|WNT11|WNT7B	http://www.genome.jp/kegg-bin/show_pathway?gga04150/gga:395829%09red/gga:395703%09red/gga:418865%09red/gga:374059%09red/gga:421939%09red/gga:427937%09red/gga:418090%09red/gga:395562%09red/gga:395784%09red
	Intestinal immune network for IgA production	KEGG PATHWAY	gga04672	4	36	0.0239337	0.167634	CCL28|PIGR|CXCL12|IL15	http://www.genome.jp/kegg-bin/show_pathway?gga04672/gga:107049316%09red/gga:395258%09red/gga:419848%09red/gga:395180%09red
	Glycosphingolipid biosynthesis - lacto and neolacto series	KEGG PATHWAY	gga00601	3	23	0.0339324	0.193922	B3GALT2|FUT9|GCNT2	http://www.genome.jp/kegg-bin/show_pathway?gga00601/gga:771133%09red/gga:769122%09red/gga:428479%09red
	MAPK signaling pathway	KEGG PATHWAY	gga04010	13	261	0.0416189	0.204206	HSPA2|IGF1|SRF|ERBB4|HSPB1|MAPK8IP1|MEF2C|FGF19|VEGFC|CACNA2D3|DUSP6|FGF3|EGF	http://www.genome.jp/kegg-bin/show_pathway?gga04010/gga:769007%09red/gga:418090%09red/gga:395394%09red/gga:422573%09red/gga:415996%09red/gga:396227%09red/gga:423202%09red/gga:396103%09red/gga:395671%09red/gga:408035%09red/gga:423504%09red/gga:396267%09red/gga:374272%09red
	Adipocytokine signaling pathway	KEGG PATHWAY	gga04920	5	64	0.041753	0.204206	PRKCQ|RXRG|TNFRSF1B|PPARGC1A|CD36	http://www.genome.jp/kegg-bin/show_pathway?gga04920/gga:396231%09red/gga:422815%09red/gga:776459%09red/gga:395083%09red/gga:417730%09red
	PPAR signaling pathway	KEGG PATHWAY	gga03320	5	64	0.041753	0.204206	FABP5|RXRG|ANGPTL4|CD36|PLIN1	http://www.genome.jp/kegg-bin/show_pathway?gga03320/gga:415487%09red/gga:396231%09red/gga:420197%09red/gga:769087%09red/gga:417730%09red
	Lysosome	KEGG PATHWAY	gga04142	7	110	0.0435258	0.211397	MANBA|AP1S3|ATP6AP1|CD164|ATP6V0A4|NAGA|ATP6V0D2	http://www.genome.jp/kegg-bin/show_pathway?gga04142/gga:420210%09red/gga:422712%09red/gga:396547%09red/gga:395380%09red/gga:424807%09red/gga:418104%09red/gga:427854%09red
	AGE-RAGE signaling pathway in diabetic complications	KEGG PATHWAY	gga04933	6	90	0.0498122	0.222791	PLCB1|COL4A3|VCAM1|VEGFC|COL3A1|COL1A2	http://www.genome.jp/kegg-bin/show_pathway?gga04933/gga:396243%09red/gga:424467%09red/gga:422573%09red/gga:396340%09red/gga:427687%09red/gga:424797%09red
	Regulation of actin cytoskeleton	KEGG PATHWAY	gga04810	10	190	0.0514243	0.227692	F2|PIP5K1B|KNG1|CHRM2|ROCK2|FGF19|INSRR|CXCL12|FGF3|EGF	http://www.genome.jp/kegg-bin/show_pathway?gga04810/gga:395306%09red/gga:424957%09red/gga:374182%09red/gga:395394%09red/gga:100857811%09red/gga:418126%09red/gga:395180%09red/gga:408035%09red/gga:427243%09red/gga:396267%09red
	Glutathione metabolism	KEGG PATHWAY	gga00480	4	47	0.0517916	0.228859	MGST2|GPX2|GGT7|HPGDS	http://www.genome.jp/kegg-bin/show_pathway?gga00480/gga:419121%09red/gga:395863%09red/gga:100857454%09red/gga:770916%09red
	Apelin signaling pathway	KEGG PATHWAY	gga04371	7	119	0.060305	0.251458	PLCB1|ADCY1|ADCY8|PPARGC1A|MEF2C|GNG4|PLIN1	http://www.genome.jp/kegg-bin/show_pathway?gga04371/gga:769007%09red/gga:415487%09red/gga:427687%09red/gga:771582%09red/gga:422815%09red/gga:420788%09red/gga:420328%09red
	Glycosphingolipid biosynthesis - globo and isoglobo series	KEGG PATHWAY	gga00603	2	13	0.0629499	0.251458	FUT9|NAGA	http://www.genome.jp/kegg-bin/show_pathway?gga00603/gga:396547%09red/gga:771133%09red
	Oocyte meiosis	KEGG PATHWAY	gga04114	6	99	0.0706854	0.269873	IGF1|ADCY1|ADCY8|CAMK2A|PGR|YWHAG	http://www.genome.jp/kegg-bin/show_pathway?gga04114/gga:374175%09red/gga:418090%09red/gga:427820%09red/gga:396198%09red/gga:420788%09red/gga:420328%09red
	Ferroptosis	KEGG PATHWAY	gga04216	3	34	0.0814187	0.292391	SLC39A8|TF|STEAP3	http://www.genome.jp/kegg-bin/show_pathway?gga04216/gga:396241%09red/gga:424275%09red/gga:430411%09red
	Glycosaminoglycan biosynthesis - keratan sulfate	KEGG PATHWAY	gga00533	2	16	0.0869332	0.303784	CHST1|B3GNT7	http://www.genome.jp/kegg-bin/show_pathway?gga00533/gga:428866%09red/gga:424930%09red
