# Supplementary material for: Comparative Transcriptome Analysis Identifies Crucial Candidate Genes and Pathways in The Hypothalamic-Pituitary-Gonadal Axis During External Genitalia Development of Male Geese
Source: Research Square preprint supplement (doi:10.21203/rs.3.rs-892387/v1), 2021-10-05
Supplement: Supplementary file 7 [file 59f9556e0fd4be7c209ae96c.xlsx]

## Sheet: Table S5
Table S5: The DEGs expression module analysis
Gene	Module labels
CHGA	black
CGA	black
PRL	black
PTGDS	black
ABI3BP	black
PDE1C	black
LOC106035359	black
ALDH1A1	black
LHX3	black
PAPPA2	black
LGALS1	black
APCDD1	black
PDGFRA	black
SCEL	black
NPBWR2	black
CARM1	black
LOC106041557	black
ENTPD1	black
PRKG2	black
APCDD1L	black
ASS1	black
USH1C	black
STRA6	black
TBX19	black
LOC106046179	black
PTGS1	black
FSHB	black
GPR149	black
TBX18	black
TMC3	black
TSHB	black
NEUROD1	black
SMIM5	black
LOC106048650	black
SULF1	black
CIB2	black
ABCA13	black
MAP3K15	black
FA2H	black
R3HDML	black
ETV4	black
LOC106039877	black
LRIT3	black
CHST9	black
PAX6	black
FAM222A	black
SLC9A3	black
ISM1	black
CD83	black
LOC106049391	black
IGF1	black
TACR3	black
TRAF4	black
GJD2	black
RUNX3	black
ST6GALNAC2	black
VWA5B2	black
TMEM125	black
MEGF6	black
FOXL2	black
PRDM6	black
CD4	black
LOC106029457	black
KRT20	black
LOC106044485	black
LOC106033477	black
LOC106044135	black
LOC106042984	black
LOC106049209	black
AGXT	black
SEMA3E	black
LOC106049451	black
SLC16A8	black
LOC106030404	black
LOC106044463	black
LOC106032214	black
CASR	black
LOC106046439	black
CA7	black
LOC106036261	black
FMOD	black
FOXG1	black
B3GALT4	black
C1QTNF3	black
NFKBID	black
KBTBD13	black
LOC106048341	black
LOC106040441	black
LOC106041199	black
LOC106047255	black
OC90	black
LOC106030520	black
LOC106041066	black
LOC106049151	black
HHLA1	black
MCHR2	black
MAB21L2	black
LOC106042277	black
CHADL	black
LOC106045942	black
LOC106035596	black
LOC106033940	black
LOC106042278	black
LOC106040990	black
LOC106034902	black
LOC106032875	blue
SCG2	blue
TF	blue
DMBT1	blue
LOC106048691	blue
LOC106031283	blue
LOC106049914	blue
LOC106049570	blue
GSN	blue
LOC106049127	blue
ANXA2	blue
RTN1	blue
PIGR	blue
LOC106049125	blue
ANXA1	blue
LOC106038982	blue
LOC106038117	blue
MAP2	blue
UCHL1	blue
VAT1L	blue
AHNAK	blue
COL1A2	blue
EMP1	blue
LOC106049915	blue
LOC106042779	blue
PPL	blue
PTPRN2	blue
MAL	blue
JCHAIN	blue
DSP	blue
SCG3	blue
DCN	blue
LOC106049347	blue
MUC13	blue
MAP1B	blue
LOC106048078	blue
DCLK1	blue
LOC106034379	blue
LOC106036393	blue
SCD5	blue
LOC106038939	blue
LUM	blue
LOC106029693	blue
NELL2	blue
MAP1A	blue
LOC106032135	blue
SYT1	blue
LOC106049913	blue
LOC106049842	blue
ITM2C	blue
LOC106048696	blue
KIF5C	blue
TNXB	blue
MMP2	blue
CALB1	blue
SPOCK1	blue
LOC106049214	blue
GABRE	blue
ST8SIA3	blue
NEFL	blue
SEZ6L	blue
LRP11	blue
LOC106049916	blue
CAV1	blue
AHNAK2	blue
LOC106049430	blue
SCN3B	blue
NRCAM	blue
CDH2	blue
UNC80	blue
LOC106034387	blue
LOC106049220	blue
CADPS	blue
PODXL2	blue
DNAJC6	blue
S100A11	blue
PDGFRB	blue
LOC106045060	blue
DYNC1I1	blue
CTSK	blue
LOC106049126	blue
PKP1	blue
CBLN1	blue
NELL1	blue
DSG2	blue
DNER	blue
CALB2	blue
CADM1	blue
EVPL	blue
NPTX2	blue
NCAM1	blue
MUSTN1	blue
EPCAM	blue
GPM6A	blue
SCRN1	blue
VWF	blue
SFRP2	blue
S100G	blue
SVEP1	blue
MYH11	blue
ELAVL4	blue
GNAO1	blue
SEMA3C	blue
ARHGEF9	blue
SPOCK3	blue
NRXN1	blue
LOC106044052	blue
IL4I1	blue
PLCXD3	blue
RAB3C	blue
KIAA0319	blue
LOC106041022	blue
LOC106048083	blue
TNR	blue
PHYHIPL	blue
LOC106045190	blue
CIT	blue
PI16	blue
PCLO	blue
SH3GL2	blue
CCDC92	blue
ELAVL2	blue
EMILIN2	blue
PIWIL1	blue
UNC5D	blue
LOC106037025	blue
GDF1	blue
RIMBP2	blue
LOC106049224	blue
KIAA1644	blue
KCND3	blue
TENM2	blue
KCNIP1	blue
CNR1	blue
CD44	blue
MUC16	blue
ELMOD1	blue
SCGN	blue
MFAP5	blue
CNTNAP2	blue
TNFSF10	blue
CCK	blue
ADIPOQ	blue
SCARA5	blue
TGM4	blue
FAM169A	blue
IQSEC3	blue
DOCK3	blue
RASGRF1	blue
NR5A1	blue
EMB	blue
AQP1	blue
LOC106048637	blue
LOC106035746	blue
LOC106029947	blue
LOC106049813	blue
LOC106042189	blue
STXBP5L	blue
PI15	blue
LOC106049607	blue
TMEM35	blue
AMER2	blue
TENM1	blue
CNTNAP5	blue
QRFPR	blue
GRIA2	blue
SERPIND1	blue
LOC106037496	blue
TMEM200C	blue
MYOF	blue
LOC106045937	blue
NEFM	blue
LOC106034343	blue
NGB	blue
NALCN	blue
GRIA1	blue
OGDHL	blue
CNTN2	blue
FSTL5	blue
SMPD3	blue
NCAM2	blue
FBLN2	blue
FRAS1	blue
ATRNL1	blue
SPHKAP	blue
PRELP	blue
ELN	blue
LOC106029991	blue
INPP5J	blue
S100A16	blue
FAXC	blue
LOC106043480	blue
BGLAP	blue
PRSS12	blue
FABP3	blue
SLC4A8	blue
CRIP1	blue
ENDOD1	blue
LOC106049814	blue
ERBB4	blue
MAPK8IP2	blue
TM4SF1	blue
LOC106048069	blue
ADGRD1	blue
MPPED1	blue
BARX2	blue
LOC106048981	blue
ADAM23	blue
HTRA3	blue
CSMD2	blue
PIH1D3	blue
GABRG1	blue
HOPX	blue
LOC106032659	blue
LOC106034007	blue
APBA2	blue
BST1	blue
UNC79	blue
LOC106040353	blue
B3GAT1	blue
ADGRL3	blue
LOC106049106	blue
ASTN2	blue
CDKL2	blue
LOC106049116	blue
SAA2	blue
KRT23	blue
LOC106029826	blue
LOC106030656	blue
AKAP6	blue
CLSTN2	blue
LOC106049115	blue
LOC106037565	blue
SCNN1A	blue
LOC106038582	blue
RAB3B	blue
CFAP74	blue
LOC106040826	blue
WSCD1	blue
GABRA1	blue
SYCP1	blue
WDR17	blue
FNDC1	blue
CTNND2	blue
EML5	blue
SEMA3D	blue
CA10	blue
LOC106042170	blue
LOC106032717	blue
IGSF21	blue
C1QTNF4	blue
EPS8L2	blue
FAM107A	blue
LOC106049425	blue
PAPLN	blue
LOC106041939	blue
NIM1K	blue
PAK7	blue
LOC106032520	blue
CNRIP1	blue
F13A1	blue
LOC106032402	blue
DPP10	blue
RIMS2	blue
MAL2	blue
LOC106041678	blue
TCTE1	blue
PHF24	blue
SLC12A5	blue
LGALS3	blue
LOC106040774	blue
GABRB2	blue
UPK1B	blue
IGFBP4	blue
GDAP1	blue
LOC106046592	blue
CELF6	blue
PPP4R4	blue
DNAH5	blue
SMOC1	blue
GRM7	blue
TRIM29	blue
NMNAT2	blue
RGS7	blue
CPED1	blue
IGDCC4	blue
CERS1	blue
ELOVL2	blue
SRCIN1	blue
FAM81A	blue
RSPH1	blue
MAPK10	blue
LOC106049217	blue
LOC106039424	blue
LOC106037566	blue
LRRN1	blue
SLC1A1	blue
CCDC108	blue
LOC106033708	blue
SVOP	blue
PTPRT	blue
NEFH	blue
LOC106041875	blue
B4GALT6	blue
LOC106043988	blue
LOC106033657	blue
ABRA	blue
ADGRV1	blue
FZD3	blue
FRMPD3	blue
MLC1	blue
GALNT9	blue
KIF26B	blue
ABHD3	blue
PPM1E	blue
TRPC5	blue
GABRB3	blue
SFN	blue
SPAG17	blue
CDH4	blue
RGS6	blue
WASF1	blue
SRRM4	blue
LOC106029373	blue
LOC106032695	blue
RAPGEF4	blue
MYT1L	blue
TMOD1	blue
CFAP52	blue
GEM	blue
MDGA2	blue
PVALB	blue
GPR12	blue
CHRNA3	blue
AK8	blue
LOC106049424	blue
SHANK2	blue
CELF4	blue
TMEM178B	blue
FRRS1L	blue
DNAJB13	blue
LOC106031977	blue
CLIC5	blue
KIAA1211	blue
FAM46D	blue
GRIA4	blue
ACBD7	blue
ANXA8L1	blue
SYCP2	blue
LOC106031592	blue
FAM180B	blue
GAD1	blue
EFHC1	blue
CORIN	blue
TEKT2	blue
LOC106044997	blue
EXPH5	blue
GRIA3	blue
LOC106037216	blue
LOC106029811	blue
LOC106044537	blue
LOC106029718	blue
MMEL1	blue
FGFBP1	blue
P2RY2	blue
GPR158	blue
PHACTR1	blue
LOC106046904	blue
FGF13	blue
PPP2R2C	blue
LOC106045644	blue
BAIAP2L1	blue
GLRB	blue
LOC106030330	blue
GFRA1	blue
SHTN1	blue
GPR37	blue
EHF	blue
CRB2	blue
FMN2	blue
TMEM74	blue
LRP1B	blue
RYR2	blue
CERS6	blue
LOC106041346	blue
TOX2	blue
LOC106037161	blue
CNTN4	blue
PCP4	blue
C1R	blue
CX3CL1	blue
DNAAF1	blue
LRTM2	blue
KCNJ5	blue
RUNDC3B	blue
TRPM2	blue
FRMD3	blue
COCH	blue
LOC106047527	blue
GLIPR2	blue
SPAG6	blue
CDH6	blue
CD34	blue
CADM2	blue
LOC106045020	blue
HSD11B2	blue
DRC1	blue
IGSF9B	blue
EFHC2	blue
TCERG1L	blue
LOC106049613	blue
SLC6A14	blue
RAB36	blue
MGAT5B	blue
FBLN5	blue
RPRML	blue
LOC106041379	blue
LY86	blue
MMP11	blue
NWD2	blue
SNTG1	blue
PARP6	blue
ASB2	blue
RSPO3	blue
SYN3	blue
FRMPD4	blue
NLGN1	blue
LYVE1	blue
KNDC1	blue
ZDHHC22	blue
TMEM132B	blue
CACNA1D	blue
CCNA1	blue
LOC106029871	blue
SLC8A3	blue
TMEM151B	blue
LOC106029827	blue
DNALI1	blue
LOC106034965	blue
GNAZ	blue
LMO3	blue
TFCP2L1	blue
PDPN	blue
OPCML	blue
CDH10	blue
KLF4	blue
COL15A1	blue
LOC106036132	blue
FBXO16	blue
SRD5A2	blue
LRRC4C	blue
OSTN	blue
BAALC	blue
SSX2IP	blue
PLCL1	blue
SYT17	blue
CLVS2	blue
LOC106040563	blue
MFSD4	blue
MAMDC2	blue
CSMD1	blue
LOC106039426	blue
PALMD	blue
CACNA1B	blue
DNAH1	blue
LOC106032874	blue
LOC106035552	blue
DISP2	blue
LOC106045318	blue
LOC106030608	blue
DGKG	blue
RHBDL3	blue
EBF1	blue
CFAP47	blue
KCNC2	blue
LOC106031322	blue
TMPRSS4	blue
ADAMTS15	blue
GRIN2B	blue
CCL28	blue
KCTD16	blue
SLC35F3	blue
GRIN3A	blue
PCDH11X	blue
GDPD2	blue
LRRC38	blue
WDR78	blue
LOC106033173	blue
LOC106047137	blue
LRRC7	blue
STK32B	blue
CPXM1	blue
UNC5A	blue
TRHDE	blue
TPD52L1	blue
SS18L1	blue
LOC106043266	blue
LOC106043001	blue
TLL2	blue
TEKT3	blue
DCC	blue
RIMS4	blue
DAB1	blue
CSDC2	blue
NYAP2	blue
GRIK2	blue
PLEKHH1	blue
CSMD3	blue
AK9	blue
CNTN5	blue
FGF14	blue
AGBL4	blue
LRP2	blue
LOC106039287	blue
ENKUR	blue
ELF3	blue
LOC106038708	blue
LOC106043688	blue
KCNH6	blue
ADAM11	blue
CAMK1G	blue
CACNA2D3	blue
TRIM9	blue
ANTXR1	blue
TLR5	blue
LOC106046024	blue
GPR52	blue
HCN4	blue
LOC106045728	blue
THBS4	blue
ROBO2	blue
DRD3	blue
MYT1	blue
SLITRK2	blue
ST6GAL2	blue
DNAH10	blue
DAW1	blue
LOC106031973	blue
SSTR5	blue
FAM19A5	blue
LOC106047857	blue
THSD7B	blue
OSR1	blue
LOC106037996	blue
LOC106032198	blue
LOC106030908	blue
UNC5C	blue
GLDC	blue
LOC106043254	blue
FSTL4	blue
LOC106043338	blue
TERT	blue
VWA5B1	blue
WDR63	blue
RBFOX1	blue
PRMT8	blue
LOC106049525	blue
RAB25	blue
MTMR7	blue
GRIK3	blue
SORCS3	blue
BRINP3	blue
KCNK10	blue
LAD1	blue
PACRG	blue
AKR1D1	blue
NT5E	blue
GOLPH3L	blue
SERPINB5	blue
F8	blue
CCDC96	blue
GRM1	blue
DPYSL4	blue
ECSCR	blue
GLDN	blue
SLC24A2	blue
SLC6A4	blue
MCTP2	blue
ARHGAP44	blue
LOC106029911	blue
LOC106046118	blue
CRB1	blue
PCDH15	blue
LOC106034733	blue
PLCH1	blue
SLITRK4	blue
TMEM79	blue
LOC106041938	blue
LOC106046276	blue
DNAI2	blue
GRM4	blue
SV2C	blue
PRDM1	blue
LOC106030345	blue
FAM221A	blue
PEX5L	blue
ZNF750	blue
EFCAB1	blue
LOC106036866	blue
DNAH3	blue
FAM189A1	blue
LOC106030587	blue
CLIC3	blue
ZBBX	blue
CFAP61	blue
LOC106040568	blue
COL11A1	blue
ARMC4	blue
ACOT12	blue
PTN	blue
GREB1	blue
ANKRD42	blue
SFRP4	blue
LOC106036018	blue
IL1RAPL2	blue
LOC106040162	blue
HAS2	blue
GALNT8	blue
CAPG	blue
GPR85	blue
GABRP	blue
LOC106045260	blue
FAM135B	blue
MYO16	blue
LRRTM4	blue
GGT1	blue
LOC106046114	blue
REEP6	blue
DFNB31	blue
MUC1	blue
DLGAP1	blue
LOC106048008	blue
LOC106042621	blue
LOC106039202	blue
FAT2	blue
ARC	blue
LOC106031913	blue
ZC2HC1C	blue
CREG2	blue
RFX6	blue
SCN1A	blue
DLGAP2	blue
GRIN2A	blue
CDH12	blue
GRID1	blue
GRIP1	blue
MOXD1	blue
JAKMIP3	blue
MYO3B	blue
FHAD1	blue
CFAP54	blue
TMEM233	blue
DUOX2	blue
TTC29	blue
FGF7	blue
RSPH9	blue
BLNK	blue
LOC106049378	blue
NTSR1	blue
TPH2	blue
TOX3	blue
EPHA2	blue
OLFML1	blue
MCOLN3	blue
CCDC65	blue
LPAR3	blue
LOC106040105	blue
LOC106030347	blue
MEGF11	blue
CDH8	blue
PPAPDC1A	blue
GCNT3	blue
RERGL	blue
KCNV1	blue
LHFPL4	blue
GRIK4	blue
WNT4	blue
DSCAML1	blue
LOC106042084	blue
CCDC169	blue
LOC106048702	blue
KCNT1	blue
LOC106048284	blue
PCYT1B	blue
LOC106037481	blue
LRP8	blue
LOC106046593	blue
LVRN	blue
LPAR2	blue
FAM3D	blue
CAPN9	blue
SPACA1	blue
FGF1	blue
LOC106039792	blue
GRHL3	blue
LOC106046335	blue
CUX2	blue
LOC106039154	blue
ERC2	blue
CDH18	blue
HOXA10	blue
ADM	blue
LOC106046419	blue
FKBP1B	blue
LOC106040243	blue
LOC106035495	blue
KATNAL2	blue
GALR1	blue
LMO1	blue
LOC106040825	blue
PRRX1	blue
PROM2	blue
LOC106049501	blue
FKBP10	blue
C1QTNF5	blue
CLVS1	blue
FOXJ1	blue
KCNS3	blue
GRID2IP	blue
WDR66	blue
KHDRBS2	blue
LOC106042993	blue
LIN28B	blue
GRM8	blue
CFAP221	blue
MAPK4	blue
KCNJ11	blue
LOC106038824	blue
KIF17	blue
TRPM3	blue
PCDH8	blue
GABRD	blue
PTX3	blue
LOC106041656	blue
CACNA1I	blue
RNF182	blue
LRRTM3	blue
CHRM2	blue
MZB1	blue
MMP7	blue
AJAP1	blue
CCDC60	blue
SPIC	blue
LOC106032170	blue
ADAM28	blue
LOC106033957	blue
LOC106033931	blue
LOC106046449	blue
CTXN2	blue
KCNG3	blue
FAM198A	blue
LOC106044451	blue
CCBE1	blue
LOC106042585	blue
FAM228B	blue
EPHA10	blue
TMSB4X	blue
LOC106029334	blue
CFAP43	blue
KCNH7	blue
LOC106041193	blue
DRC7	blue
KCNJ3	blue
FADS6	blue
LRRIQ1	blue
LOC106034203	blue
SERTM1	blue
LOC106033807	blue
LOC106047064	blue
KCNQ2	blue
LOC106048804	blue
LOC106029516	blue
MYO3A	blue
LOC106032155	blue
IGSF5	blue
ROS1	blue
LOC106039833	blue
PLIN1	blue
IRF4	blue
LOC106041540	blue
SPAG16	blue
SH3BP1	blue
LOC106037776	blue
LOC106048011	blue
NRG3	blue
TEKT1	blue
ARHGEF38	blue
CNIH3	blue
SLC30A10	blue
LOC106032197	blue
LRRC23	blue
AIM1L	blue
CPNE4	blue
CCDC89	blue
AMER3	blue
DPP6	blue
TBX4	blue
FAM155A	blue
SLC26A1	blue
AADAC	blue
LOC106044077	blue
PLD5	blue
XG	blue
LOC106036557	blue
MATN3	blue
TMEM184A	blue
RASL10B	blue
PCSK4	blue
PPP1R42	blue
CNTN3	blue
AK7	blue
LOC106049353	blue
TCTEX1D1	blue
FAM163B	blue
TMEM154	blue
PKD2L2	blue
ARMC3	blue
RSPH14	blue
ZNF804A	blue
NEK10	blue
BMPR1B	blue
DCDC2	blue
CACNG5	blue
ELF5	blue
ANKEF1	blue
FMO3	blue
LOC106043422	blue
LOC106044166	blue
LOC106039112	blue
LOC106043334	blue
SLC18A1	blue
LOC106037398	blue
GLT1D1	blue
VWC2	blue
CHODL	blue
LOC106045416	blue
LOC106036851	blue
MAATS1	blue
SRRM3	blue
LOC106047381	blue
LOC106036158	blue
CD72	blue
DYNLRB2	blue
TRPM8	blue
LOC106033825	blue
RAD21L1	blue
LOC106037626	blue
LOC106046337	blue
LOC106037071	blue
CWH43	blue
LOC106044992	blue
RBFOX3	blue
LOC106048496	blue
LRRC6	blue
TTC34	blue
LOC106040620	blue
TMEM196	blue
CCDC157	blue
SLC7A2	blue
ADGB	blue
RNF223	blue
LOC106049360	blue
LOC106032731	blue
LOC106039065	blue
SLC5A11	blue
FAM196B	blue
VGLL1	blue
LOC106034596	blue
TCF24	blue
LOC106039746	blue
HPSE2	blue
DEGS2	blue
LOC106038121	blue
FAM180A	blue
GHSR	blue
HCN1	blue
LOC106039644	blue
LOC106048978	blue
SLC7A10	blue
DYNAP	blue
HOXA9	blue
IGSF11	blue
LOC106048930	blue
LOC106039179	blue
GAL3ST2	blue
TWIST2	blue
LOC106045023	blue
RHCG	blue
CCDC64	blue
LOC106046538	blue
GPR19	blue
RASAL3	blue
LOC106041409	blue
OFCC1	blue
KIF6	blue
ALDOB	blue
KCNA4	blue
LOC106041363	blue
LINGO2	blue
LOC106033930	blue
LOC106029437	blue
VSTM2B	blue
ESR2	blue
OPN3	blue
LOC106049328	blue
LHX6	blue
LOC106034196	blue
RGS20	blue
TMEM198	blue
ACKR4	blue
MCHR1	blue
ADCY1	blue
C1QTNF7	blue
MUC15	blue
LOC106033478	blue
FSIP1	blue
LOC106033123	blue
CFTR	blue
CHST8	blue
KCNK12	blue
AGBL1	blue
VWC2L	blue
CILP2	blue
ANKRD34B	blue
LOC106033533	blue
LOC106049819	blue
LOC106045839	blue
FAM124A	blue
LOC106044076	blue
FAM83C	blue
CCDC103	blue
NWD1	blue
LOC106031455	blue
LOC106036777	blue
LPAR5	blue
PSTPIP1	blue
SAXO2	blue
FOXA1	blue
RNF222	blue
RPP25	blue
GPR139	blue
SLC35D3	blue
IL1RAPL1	blue
GPX2	blue
LOC106036929	blue
COL27A1	blue
LOC106043646	blue
FAM19A1	blue
HBEGF	blue
LOC106034118	blue
SH3RF2	blue
LOC106034628	blue
LOC106049206	blue
LOC106039588	blue
CLCN1	blue
LOC106043137	blue
LOC106047031	blue
CA9	blue
LOC106049473	blue
KCNJ15	blue
EPSTI1	blue
FAM83G	blue
KL	blue
WISP2	blue
SLITRK3	blue
ALK	blue
NME8	blue
ADGRD2	blue
LOC106034881	blue
FOXA2	blue
CCDC166	blue
LOC106032324	blue
LOC106033686	blue
KCTD8	blue
TMPRSS13	blue
LOC106029347	blue
LOC106038866	blue
LOC106049810	blue
LOC106048964	blue
LOC106042190	blue
BCL2L15	blue
LOC106039614	blue
LOC106032274	blue
CD79B	blue
AQP5	blue
ST6GALNAC5	blue
LOC106044538	blue
LOC106041365	blue
LOC106036575	blue
BDKRB2	blue
LOC106048983	blue
DGKI	blue
LOC106049352	blue
LOC106046523	blue
LOC106032502	blue
LOC106038813	blue
SPDEF	blue
LOC106036125	blue
LOC106048848	blue
SLC24A4	blue
LOC106040543	blue
LOC106035253	blue
HOXD12	blue
LOC106030323	blue
WNT2B	blue
LOC106042888	blue
EPPK1	blue
LAMC2	blue
LOC106047395	blue
OPN4	blue
FOXI1	blue
44259	blue
CALHM2	blue
LOC106032916	blue
LOC106030620	blue
LOC106041660	blue
PHEX	blue
LOC106041918	blue
LOC106043429	blue
PIFO	blue
CBLN4	blue
LOC106045158	blue
TMEM173	blue
LOC106042218	blue
RAX	blue
CALN1	blue
SYCP2L	blue
LOC106049456	blue
ANKRD22	blue
LHX1	blue
SPATA17	blue
LOC106047593	blue
GREM1	blue
LOC106036622	blue
LOC106046725	blue
HPX	blue
LOC106029452	blue
LOC106034526	blue
TNFRSF13B	blue
HTR1E	blue
TWIST1	blue
MYB	blue
ANO7	blue
SYT8	blue
HOXA13	blue
LOC106029566	blue
LOC106035538	blue
ANKRD55	blue
LOC106036868	blue
LOC106049811	blue
TCTE3	blue
LRIT1	blue
TBX22	blue
SMCO3	blue
ATP8B3	blue
GABRG3	blue
LOC106037734	blue
ADGRF4	blue
SDCBP2	blue
HOXA11	blue
PKD2L1	blue
LOC106040070	blue
KCNH8	blue
LOC106049357	blue
GPR87	blue
UGT2B17	blue
LOC106034513	blue
LOC106039164	blue
GRPR	blue
ANKK1	blue
ATP6V0D2	blue
LOC106043125	blue
DCHS2	blue
GABRB1	blue
MLIP	blue
LOC106037894	blue
CACNG1	blue
SLCO1A2	blue
RBP7	blue
LOC106046668	blue
GMNC	blue
LOC106044639	blue
SLITRK5	blue
GJB3	blue
LOC106040788	blue
LOC106030951	blue
LRRC72	blue
LOC106044909	blue
LOC106047166	blue
LOC106043562	blue
LOC106034625	blue
LOC106048653	blue
LOC106032938	blue
SLC39A4	blue
LOC106040182	blue
SIM2	blue
IL13RA2	blue
LOC106037617	blue
PLEKHN1	blue
SNTG2	blue
LOC106034039	blue
XKR7	blue
LOC106029607	blue
LOC106033928	blue
PCDHAC1	blue
CLDN25	blue
LOC106046531	blue
PTHLH	blue
LOC106046682	blue
LOC106048913	blue
PARD6A	blue
LOC106034515	blue
SLC4A5	blue
LOC106030714	blue
LOC106038273	blue
ARSI	blue
LOC106043867	blue
LOC106041034	blue
MORN2	blue
DBX2	blue
LOC106034338	blue
LOC106035492	blue
LOC106033608	blue
FRMPD2	blue
LOC106047592	blue
GPR55	blue
LOC106036160	blue
LOC106040867	blue
IGFALS	blue
RBBP8NL	blue
LHX8	blue
HOXD13	blue
LOC106047434	blue
PDZD7	blue
LOC106043396	blue
LOC106037278	blue
TBX15	blue
LOC106047904	blue
LOC106044888	blue
LOC106048724	blue
LOC106047514	blue
KCNK9	blue
LOC106039349	blue
LOC106040633	blue
LOC106031206	blue
PAX9	blue
ZSWIM2	blue
LOC106040637	blue
LOC106049216	blue
LOC106043339	blue
LOC106049351	blue
OLFM4	blue
LOC106035507	blue
LOC106030329	blue
CLDN23	blue
SPAG8	blue
LOC106034197	blue
ART4	blue
LOC106030390	blue
EVX2	blue
LOC106035112	blue
LOC106042178	blue
LOC106044102	blue
LOC106029551	blue
LOC106048322	blue
LOC106037239	blue
SHC3	blue
LOC106047046	blue
LOC106046257	blue
LOC106049812	blue
SGCZ	blue
LOC106035502	blue
LOC106037355	blue
DAO	blue
LOC106031701	blue
LOC106034024	blue
SPRR2G	blue
LOC106032284	blue
BMP3	blue
GJD4	blue
LOC106043149	blue
LOC106048410	blue
CACNA2D4	blue
LOC106041040	blue
HOXD11	blue
LOC106037034	blue
LOC106040207	blue
CCR6	blue
FRK	blue
LOC106049561	blue
WDR93	blue
LOC106033263	blue
LOC106029872	blue
LOC106042559	blue
MAB21L1	blue
LOC106049503	blue
LOC106045968	blue
LOC106046420	blue
LOC106030045	blue
LOC106036355	blue
LOC106029629	blue
LOC106039069	blue
PGLYRP2	blue
LOC106042217	blue
LOC106047155	blue
LOC106030280	blue
LOC106044704	blue
LOC106049629	blue
GCM2	blue
LOC106037961	blue
LOC106048034	blue
RPE65	blue
PHLDA3	blue
LOC106049712	blue
LOC106049440	blue
LHX2	blue
LOC106045283	blue
LOC106043648	blue
GUCA1C	blue
LOC106032283	blue
LOC106031694	blue
LOC106048857	blue
LOC106042182	blue
AICDA	blue
LOC106029758	blue
LOC106033651	blue
GPC6	blue
LOC106046783	blue
LOC106032396	blue
LOC106029500	blue
ERP27	blue
LOC106041807	blue
LOC106042411	blue
LOC106037804	blue
LOC106033132	blue
LOC106041364	blue
REG4	blue
TRPM5	blue
CAPN8	blue
TMPRSS15	blue
LOC106038263	blue
LOC106032954	blue
PTPN20	blue
LOC106042251	blue
MUC4	blue
LOC106046562	blue
LOC106039130	blue
THPO	blue
LOC106032282	blue
LOC106042705	blue
LOC106039115	blue
GPR20	blue
LOC106042878	blue
LOC106034099	blue
HOXD10	blue
SIAH3	blue
OLAH	blue
LSMEM1	blue
LOC106030799	blue
LOC106037777	blue
LOC106047427	blue
LOC106029938	blue
VSX1	blue
LOC106045920	blue
LOC106045361	blue
LOC106045322	blue
WNT8A	blue
LOC106047045	blue
LOC106030617	blue
LOC106048240	blue
LIF	blue
LOC106048703	blue
NHLH1	blue
LOC106034136	blue
LOC106037937	blue
LOC106046511	blue
GRP	blue
LOC106029571	blue
STOML3	blue
SCML4	blue
LOC106042788	blue
LOC106035483	blue
LOC106045119	blue
LOC106048935	blue
LOC106046258	blue
LOC106036319	blue
SLC25A31	blue
LOC106044454	blue
SKOR1	blue
LOC106031991	blue
INSL5	blue
TBX5	blue
LOC106031687	blue
LOC106030081	blue
LOC106033968	blue
LOC106040201	blue
KNG1	blue
SULT2B1	blue
LOC106042504	blue
TULP1	blue
LOC106046401	blue
LOC106036733	blue
LOC106037809	blue
LOC106046049	blue
ZP2	blue
LOC106037275	blue
LOC106038271	blue
LOC106045506	blue
LOC106042331	blue
LOC106029343	blue
LOC106036526	blue
LOC106044653	blue
LOC106030713	blue
LOC106033675	blue
LOC106037510	blue
EVX1	blue
GALR3	blue
LOC106044703	blue
LOC106047330	blue
LOC106040844	blue
TDGF1	blue
LOC106049423	blue
LOC106029451	blue
LOC106042145	blue
CRYAA	blue
LOC106042307	blue
BMX	blue
LOC106045608	blue
LOC106045934	blue
LOC106046735	blue
SLC4A9	blue
GBX2	blue
LOC106043374	blue
NPFFR2	blue
LOC106049912	blue
LOC106035761	blue
LOC106042877	blue
LOC106037606	blue
LOC106049225	blue
LOC106030514	blue
LOC106036885	blue
LOC106032137	blue
LOC106032647	blue
LOC106048290	blue
ANKS4B	blue
LOC106048656	blue
GKN2	blue
SHOX	blue
LOC106033262	blue
TMEM238	blue
LOC106047590	blue
OMP	blue
LOC106049630	blue
ANGPTL5	blue
LOC106039174	blue
LOC106033600	blue
LOC106030021	blue
RAB42	blue
LOC106030403	blue
LOC106032840	blue
LOC106039385	blue
LOC106040505	blue
LOC106032249	blue
LOC106030794	blue
TMEM54	blue
LOC106047775	blue
LOC106049095	blue
BIRC7	blue
ACER1	blue
LOC106041374	blue
APOBEC1	blue
LOC106047251	blue
LOC106047384	blue
LOC106032904	blue
LOC106038237	blue
AQP10	blue
LOC106049881	blue
LOC106029529	blue
LOC106030789	blue
TBR1	blue
PCSK9	blue
LOC106043488	blue
FGF20	blue
LOC106036460	blue
LOC106046398	blue
LOC106033862	blue
LOC106041227	blue
HOXA1	blue
LOC106031963	blue
LOC106030304	blue
LOC106029617	blue
LOC106032401	blue
LOC106047591	blue
LOC106030532	blue
LOC106042973	blue
LOC106048737	blue
ASIP	blue
LOC106047837	blue
LOC106048348	blue
LOC106037778	blue
LOC106041292	blue
LOC106047723	blue
LOC106048552	blue
LOC106031668	blue
LOC106038496	blue
HOXD4	blue
HAS3	blue
LOC106047374	blue
COL3A1	brown
NDRG4	brown
FBN1	brown
LOC106043857	brown
MLLT11	brown
NAPB	brown
ENO2	brown
COL6A1	brown
LOC106029333	brown
GFAP	brown
COL6A2	brown
TSPAN7	brown
KIF1A	brown
GABBR1	brown
MGP	brown
COL6A3	brown
ABAT	brown
LOC106040409	brown
YBX3	brown
STMN2	brown
LOC106044438	brown
LOC106044619	brown
CLSTN3	brown
SYT11	brown
SERPINF1	brown
GABRA3	brown
GAD2	brown
SNAP25	brown
FAIM2	brown
CLDN1	brown
ACTA2	brown
CRYM	brown
CNTN1	brown
YWHAG	brown
LOC106040258	brown
BASP1	brown
OGN	brown
PTPRZ1	brown
GAP43	brown
ALDH1A3	brown
PDGFD	brown
VSNL1	brown
ASTN1	brown
SLC4A10	brown
NTRK2	brown
SYNGR3	brown
GRIN1	brown
PHGDH	brown
THBS1	brown
AGT	brown
COL4A5	brown
SNAP91	brown
LOC106047770	brown
LOC106037591	brown
SLC17A6	brown
VTN	brown
ANTXR2	brown
PGM5	brown
PENK	brown
LOC106029456	brown
LOC106044792	brown
CTNNA2	brown
DNM3	brown
C7	brown
MMRN1	brown
DDC	brown
GAL	brown
RGS4	brown
PRKCB	brown
TFPI2	brown
PACSIN3	brown
NCALD	brown
MYL9	brown
SYNPR	brown
SLC6A1	brown
SLIT1	brown
NAT8L	brown
MBP	brown
PDLIM3	brown
LOC106032917	brown
HTR1B	brown
LRRC73	brown
ENHO	brown
CAMK2A	brown
CD99	brown
CD36	brown
ACSL6	brown
GABRA2	brown
TMEM59L	brown
APC2	brown
COL25A1	brown
POSTN	brown
SPON2	brown
PIANP	brown
NTS	brown
PTPRO	brown
LOC106037920	brown
SLC6A11	brown
SLC32A1	brown
MMD2	brown
THBS2	brown
PLXNA4	brown
TAGLN3	brown
AMPH	brown
ABCG4	brown
AIM1	brown
COL17A1	brown
FAM46C	brown
ADD2	brown
SLC18A2	brown
LOC106038521	brown
MYO5C	brown
CTXN1	brown
SSTR1	brown
PSD2	brown
ST8SIA6	brown
MMP17	brown
TGFBI	brown
GFPT2	brown
RBM47	brown
SGIP1	brown
NKAIN4	brown
SNCG	brown
SYT13	brown
KIF3C	brown
ADCYAP1R1	brown
LOC106048082	brown
CAMKV	brown
ABHD8	brown
SCN2B	brown
GPR1	brown
LOC106046278	brown
ARHGEF5	brown
LOC106029395	brown
AATK	brown
AQP4	brown
SLC6A9	brown
APOLD1	brown
KCNJ10	brown
NRIP3	brown
LOC106044237	brown
LOC106033320	brown
ADAM22	brown
PCDH10	brown
COMP	brown
ATP8B1	brown
LOC106048544	brown
LOC106048195	brown
KCNIP2	brown
SV2A	brown
LGI1	brown
LOC106046590	brown
AGTR1	brown
NPY	brown
PPFIA4	brown
KIRREL3	brown
LOC106043213	brown
FBXO41	brown
LSAMP	brown
CDH22	brown
LOC106049198	brown
LOC106036299	brown
EPDR1	brown
LOC106049530	brown
EGF	brown
NRGN	brown
KSR2	brown
RALYL	brown
FAM198B	brown
LOC106029739	brown
DOC2B	brown
FAP	brown
CDK5R2	brown
LOC106034602	brown
CRHBP	brown
CMTM7	brown
RIMS1	brown
CNTNAP1	brown
LMOD2	brown
OLFM2	brown
KCNA2	brown
KIF15	brown
NLGN4X	brown
LOC106034326	brown
CNTNAP4	brown
OMG	brown
ANKS1B	brown
LOC106047520	brown
LOC106038594	brown
TSPAN1	brown
LOC106029421	brown
PLBD1	brown
STX1A	brown
LOC106048455	brown
CENPC	brown
DRP2	brown
GPR37L1	brown
RIT2	brown
LOC106041378	brown
OLFM3	brown
GABRA5	brown
SLC13A5	brown
VIP	brown
PTK2B	brown
FUT9	brown
LOC106031819	brown
AMIGO2	brown
PTPRR	brown
CHST1	brown
ARHGAP28	brown
KCNQ3	brown
CENPE	brown
LOC106040762	brown
TAC1	brown
RNF208	brown
LOC106032655	brown
SNCA	brown
SLC1A2	brown
GLRA2	brown
LOC106048174	brown
KCNC4	brown
LOC106038763	brown
CKMT2	brown
OSR2	brown
CBLN2	brown
FAM83H	brown
DSE	brown
DGKB	brown
MPZL2	brown
ELFN2	brown
GABRA4	brown
GADL1	brown
B3GAT2	brown
LOC106045865	brown
LAPTM4B	brown
CAMK4	brown
PPP1R17	brown
PKP3	brown
CNTFR	brown
KIF21B	brown
PKIB	brown
STMN4	brown
TMEM179	brown
44442	brown
GFRAL	brown
LOC106036283	brown
ESRP1	brown
BRINP2	brown
GRM3	brown
RXFP3	brown
EPHA1	brown
JAKMIP1	brown
GCNT1	brown
HHATL	brown
FEZF1	brown
ARPP21	brown
NXPH1	brown
LOC106029466	brown
MYOCD	brown
NOXA1	brown
FBXL16	brown
LOC106029401	brown
LOC106048966	brown
NECAB2	brown
FAM160A1	brown
LOC106031011	brown
LAMP5	brown
CCDC177	brown
DLX1	brown
LPAR6	brown
ADGRB2	brown
CD3E	brown
PPFIA2	brown
PAQR9	brown
LOC106047926	brown
MAP3K8	brown
LRRTM1	brown
NOS1	brown
SLC15A2	brown
GRIK1	brown
RASD2	brown
SLC6A7	brown
HDC	brown
SLC13A3	brown
FST	brown
F2RL1	brown
PPARG	brown
GABBR2	brown
CRHR2	brown
MAP6	brown
SSTR3	brown
NCS1	brown
LRRTM2	brown
LOC106037880	brown
LOC106049843	brown
SYT3	brown
GRM5	brown
ADCYAP1	brown
JPH3	brown
SLITRK1	brown
HEPACAM	brown
44443	brown
ASPN	brown
NRN1	brown
MAD2L1	brown
LOC106043055	brown
CACNG3	brown
FAM159A	brown
LOC106048974	brown
TH	brown
LACC1	brown
VSTM2A	brown
G0S2	brown
TMEM37	brown
FAM167A	brown
SNAI2	brown
NCAN	brown
CHRNA4	brown
LOC106034738	brown
KCNF1	brown
LOC106035938	brown
LOC106037029	brown
LOC106045831	brown
ASPA	brown
ITGB6	brown
GLRA3	brown
LOC106035094	brown
CCKBR	brown
RLTPR	brown
SYT12	brown
LOC106041627	brown
NPTX1	brown
NRIP2	brown
SNPH	brown
AGRP	brown
C1QTNF2	brown
GLT8D2	brown
TTLL10	brown
LOC106032820	brown
SLC14A2	brown
SLCO1C1	brown
TMEM88B	brown
AGTR2	brown
LOC106041597	brown
COLCA2	brown
ILDR1	brown
MACC1	brown
MANSC4	brown
SOX10	brown
LOC106040101	brown
LOC106045970	brown
LOC106029374	brown
DLGAP3	brown
ADPRHL1	brown
GCHFR	brown
SALL3	brown
MC4R	brown
SYT7	brown
TFAP2A	brown
DTX1	brown
TMEM240	brown
CACNG2	brown
NKX2-1	brown
NT5C1A	brown
LOC106038930	brown
BTBD17	brown
TEAD3	brown
LOC106039709	brown
LOC106047256	brown
PNOC	brown
GALNT5	brown
NINJ2	brown
ABCB5	brown
RELL2	brown
KCND2	brown
ELFN1	brown
HMGA2	brown
LOC106045966	brown
LOC106029920	brown
NIPAL1	brown
HPCAL4	brown
TRIM63	brown
MDGA1	brown
COLQ	brown
HS3ST5	brown
NETO1	brown
LOC106035805	brown
KCTD14	brown
LOC106034905	brown
ITGB3	brown
NPY2R	brown
BEGAIN	brown
GFRA2	brown
CDH7	brown
ENTPD8	brown
LOC106030538	brown
RPH3A	brown
SLC39A12	brown
TRH	brown
KRT222	brown
CNTN6	brown
LOC106047927	brown
CALCB	brown
FAM3B	brown
LOC106034479	brown
LRFN2	brown
CASKIN1	brown
LOC106029706	brown
LOC106049527	brown
LOC106037433	brown
MVP	brown
LOC106031985	brown
LOC106037627	brown
AZIN2	brown
CA4	brown
CRTAC1	brown
SERPINF2	brown
KCNK2	brown
SLC10A1	brown
LOC106032855	brown
LOC106046014	brown
MAP3K12	brown
KCTD4	brown
CACNG4	brown
CRH	brown
SDK2	brown
TCF21	brown
SH2D5	brown
LOC106046139	brown
CHRM5	brown
ECEL1	brown
GRHL2	brown
GPR78	brown
TSHR	brown
NPY1R	brown
LOC106031722	brown
LOC106048002	brown
NIPAL2	brown
CPNE7	brown
OPRK1	brown
NKAIN2	brown
CPLX2	brown
CDH9	brown
CHST4	brown
PROK2	brown
RASSF6	brown
E2F1	brown
PTAFR	brown
AKAP5	brown
SHH	brown
LRRC75B	brown
ZMAT4	brown
PDE8B	brown
NPY5R	brown
MYADML2	brown
ERMN	brown
LOC106029615	brown
LOC106029507	brown
TXK	brown
TMEM221	brown
IL1RL1	brown
CALCR	brown
LOC106049496	brown
TFAP2C	brown
LRRC4	brown
LOC106041417	brown
FNDC9	brown
LOC106043368	brown
LOC106038953	brown
MICALCL	brown
CHRM4	brown
PRLH	brown
KLHL35	brown
LOC106039322	brown
LOC106041677	brown
LOC106049261	brown
IL2RA	brown
OVOL2	brown
HHLA2	brown
TRPV4	brown
MYLK4	brown
NPBWR1	brown
SOX14	brown
LOC106040412	brown
FAM83F	brown
[truncated: 3,163 more rows]
