# Supplementary material for: Comparative Transcriptome Analysis Identifies Crucial Candidate Genes and Pathways in The Hypothalamic-Pituitary-Gonadal Axis During External Genitalia Development of Male Geese
Source: Research Square preprint supplement (doi:10.21203/rs.3.rs-892387/v1), 2021-10-05
Supplement: Supplementary file 8 [file aa68b03f63f21c8d693fc5c3.xlsx]

## Sheet: Table S2
Table S2: The reads account and mapping rate of samples
Group	Sample name	Tissue	Raw reads	Clean reads	Clean base	Effective Rate (%)	Error rate (%)	Q20 (%)	Q30 (%)	GC content (%)	Mapping rate (%)
NEGG	NEGG-H1	hypothalamus	25713682	24534880	7.36	95.42	0.03	97.4	93.21	48.84	83.17
NEGG	NEGG-H2	hypothalamus	25340035	24017690	7.21	94.78	0.03	97.3	93.14	50.88	77.98
NEGG	NEGG-H3	hypothalamus	26652878	25641638	7.69	96.21	0.03	97.18	92.83	51.11	77.33
AEGG	AEGG-H1	hypothalamus	24568024	23479966	7.04	95.57	0.03	97.21	92.85	50.55	78.79
AEGG	AEGG-H2	hypothalamus	21861188	20826729	6.25	95.27	0.03	97.29	93.03	50.36	78.3
AEGG	AEGG-H3	hypothalamus	23711685	22424327	6.73	94.57	0.03	97.27	93.09	51.06	77.8
NEGG	NEGG-P1	pituitary gland	27406138	26032139	7.81	94.99	0.03	97.26	93.03	50.84	77.61
NEGG	NEGG-P2	pituitary gland	25726195	24121301	7.24	93.76	0.03	97.3	93.14	50.53	78.32
NEGG	NEGG-P3	pituitary gland	23489049	22081270	6.62	94.01	0.03	97.41	93.22	48.55	82.29
AEGG	AEGG-P1	pituitary gland	27264840	25855271	7.76	94.83	0.03	97.19	92.91	50.47	78.14
AEGG	AEGG-P2	pituitary gland	24042050	22879523	6.86	95.16	0.03	97.41	93.25	49.58	81.39
AEGG	AEGG-P3	pituitary gland	27798044	26068662	7.82	93.78	0.03	97.34	93.16	51.04	78.9
NEGG	NEGG-T1	testis	29877910	28733930	8.62	96.17	0.03	97.45	93.24	48.46	81.48
NEGG	NEGG-T2	testis	25673298	24728749	7.42	96.32	0.03	97.5	93.35	48.98	81.63
NEGG	NEGG-T3	testis	32176314	30674253	9.2	95.33	0.03	97.39	93.15	48.8	80.5
AEGG	AEGG-T1	testis	26121425	24756156	7.43	94.77	0.03	97.38	93.12	48.62	80.86
AEGG	AEGG-T2	testis	24492136	23241142	6.97	94.89	0.03	97.31	92.94	48.49	80.94
AEGG	AEGG-T3	testis	26949505	25563492	7.67	94.86	0.03	97.54	93.48	48.88	81.29
NEGG	NEGG-G1	external genitalia	27058316	25528660	7.66	94.35	0.03	97.42	93.28	49.6	81.72
NEGG	NEGG-G2	external genitalia	24454203	23131749	6.94	94.59	0.03	97.55	93.54	50.5	79.8
NEGG	NEGG-G3	external genitalia	23449677	22284034	6.69	95.03	0.03	97.63	93.63	49.38	83.64
AEGG	AEGG-G1	external genitalia	27939748	26518299	7.96	94.91	0.03	97.44	93.26	49.43	80.84
AEGG	AEGG-G2	external genitalia	30745545	29219188	8.77	95.04	0.03	97.39	93.19	49.66	81.21
AEGG	AEGG-G3	external genitalia	32922190	30990751	9.3	94.13	0.03	97.55	93.53	49.86	81.08
